# Supplementary material for: C–H hydrogen bond and halogen bond directed self-assembly of ethereal podands and C–X⋯F−/HF2− halogen bonding in solution
Source: Royal Society of Chemistry journal article supplement (doi:10.1039/d3ce00599b), 2023-01-01
Supplement: d3ce00599b1.pdf [file d3ce00599b1.pdf]

# C-H hydrogen bond and halogen bond directed self-assembly of ethereal podands and C-X...F<sup>-</sup>/HF<sub>2</sub><sup>-</sup> halogen bonding in solution

Dipjyoti Dutta,<sup>a</sup> Anamika Gogoi,<sup>a</sup> Rupjyoti Dutta,<sup>a,b</sup> Sarvesh S. Harmalkar,<sup>c,d</sup> Prem Lama,<sup>\*b,e</sup> Sandeep Kumar Dey,<sup>\*a,b</sup>

<sup>a</sup>Materials Science and Technology Division, CSIR-North East Institute of Science and Technology, Jorhat, Assam 785006, India. Email: [sandeep@neist.res.in](mailto:sandeep@neist.res.in)

<sup>b</sup>Academy of Scientific and Innovative Research, Ghaziabad, Uttar Pradesh 201002, India.

<sup>c</sup>School of Chemical Sciences, Goa University, Taleigao Plateau, Goa 403206, India.

<sup>d</sup>Department of Chemistry, Government College Khandola, Goa 403107, India.

<sup>e</sup>Distillate and Heavy Oil Processing Division, CSIR-Indian Institute of Petroleum, Mohkampur, Dehradun, Uttarakhand 248005, India. Email: [prem.lama@iip.res.in](mailto:prem.lama@iip.res.in)

| Sl. No. | Headings                                                                                    | Page No. |
|---------|---------------------------------------------------------------------------------------------|----------|
| 1       | Materials and experimental methods                                                          | 1        |
| 2       | Characterization of podands by NMR spectroscopy                                             | 2-10     |
| 3       | X-ray diffraction studies of podand crystals                                                | 11-16    |
| 4       | Thermogravimetry analysis of crystals                                                       | 17-19    |
| 5       | Hirshfeld surface analysis fingerprint plots                                                | 20-31    |
| 6       | C-X...F <sup>-</sup> and C-X...F <sup>-</sup> ...H-F halogen bonding in solution (X = I/Br) | 32-37    |

## 1. Materials and experimental methods

All reagents and solvents were obtained from commercial sources and used as received without further purification. Mesitylene, paraformaldehyde, 4-halophenols, 2-halophenols, 2,4-dihalophenols, 4-cyanophenol and quaternary ammonium salts were purchased from either Sigma-Aldrich or Alfa-Aesar chemicals. Solvents (analytical grade), glacial acetic acid and hydrobromic acid for synthesis and crystallization experiments were purchased from CDH chemicals (India) and used without further purification.

<sup>1</sup>H-NMR and <sup>19</sup>F-NMR spectra were recorded on a Bruker Advance FT-400 MHz instrument and chemical shifts were recorded in parts per million (ppm) on the scale using the residual solvent peak as a reference and <sup>13</sup>C spectra were obtained at 100 MHz at 298 K. Powder X-ray diffraction patterns of dried crystalline powder were recorded using a Bruker-D8 Advance X-ray diffractometer with Cu-K<sub>α</sub> radiation at λ = 0.15418 nm. Bruker D8 Quest ECO single crystal X-ray diffractometer was used for data collection at 298 K. Thermogravimetric analysis was carried out using an FTA 449 F3 Jupiter instrument under nitrogen atmosphere.

## 2. Characterization of podands by NMR spectroscopy

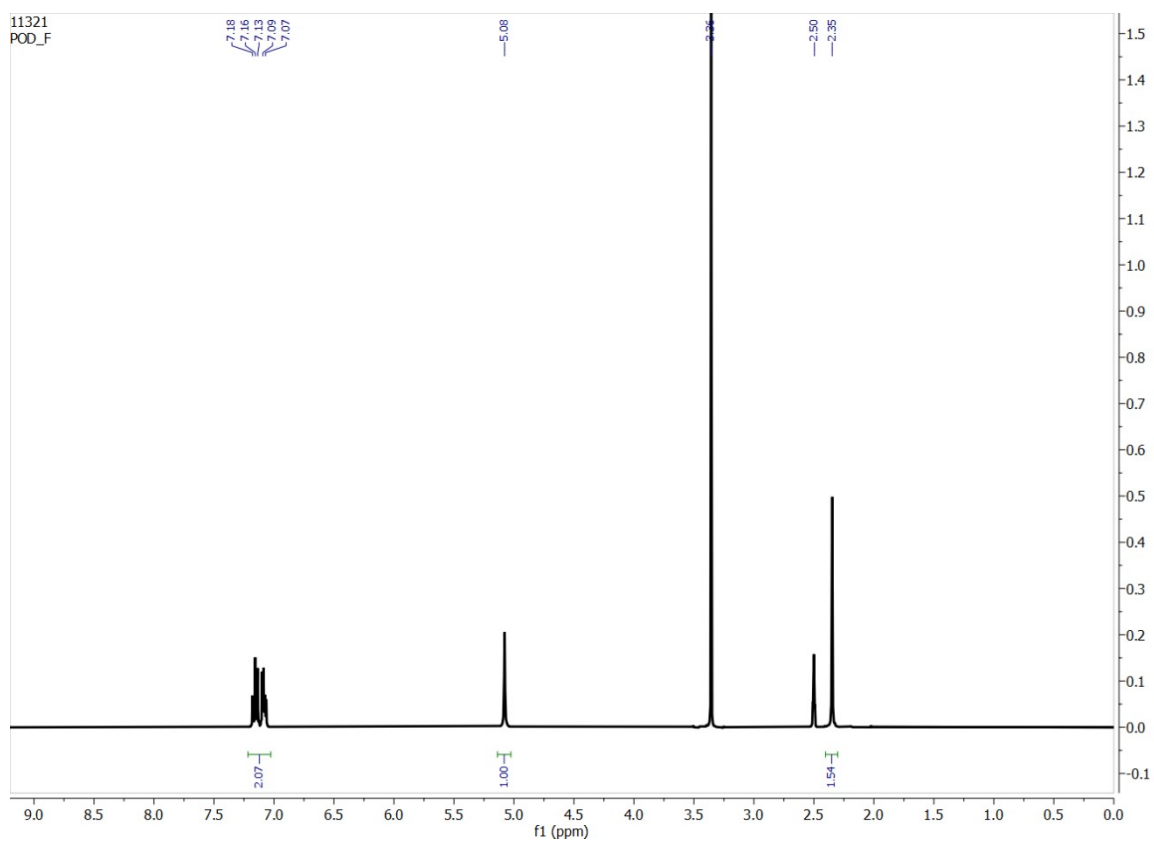

Fig. S1. <sup>1</sup>H-NMR spectrum of P1 in DMSO-D<sub>6</sub>.

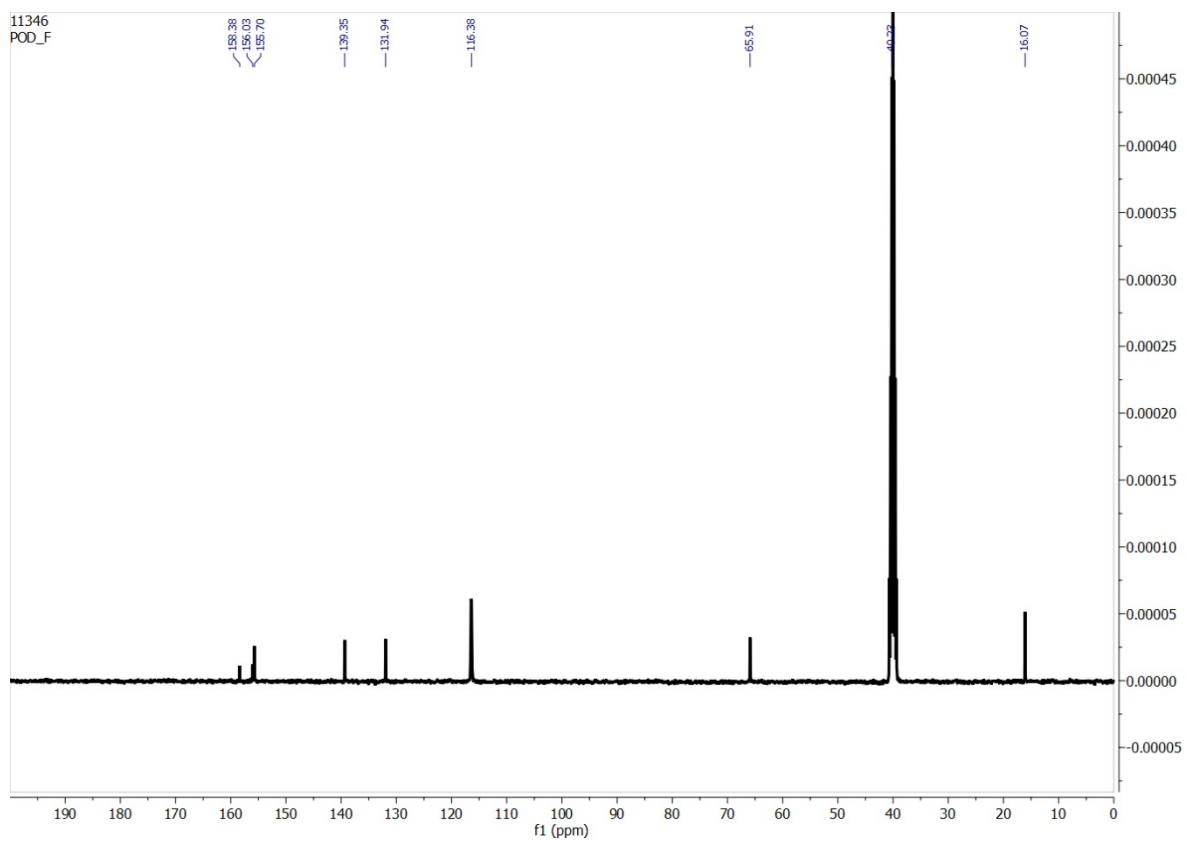

Fig. S2. <sup>13</sup>C-NMR spectrum of P1 in DMSO-D<sub>6</sub>.

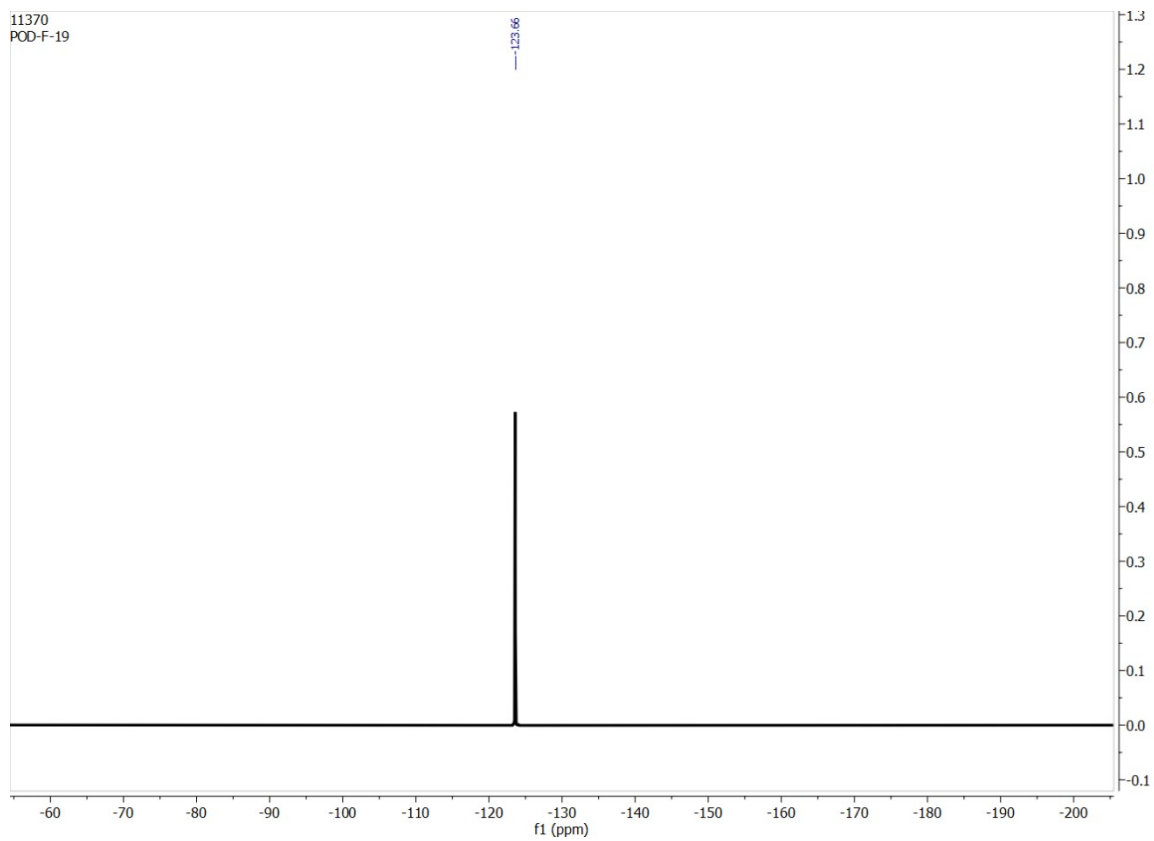

**Fig. S3.**  $^{19}\text{F}$ -NMR spectrum of **P1** in  $\text{DMSO-D}_6$ .

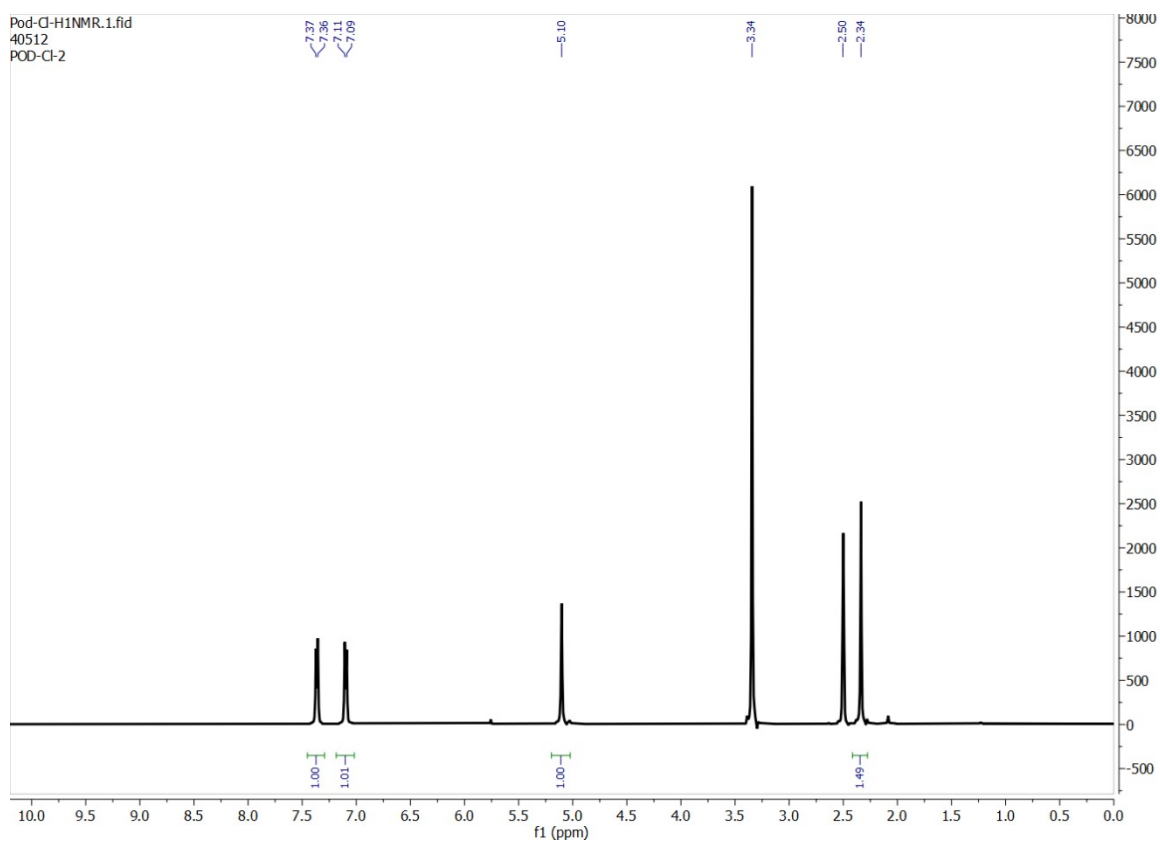

**Fig. S4.**  $^1\text{H}$ -NMR spectrum of **P2** in  $\text{DMSO-D}_6$ .

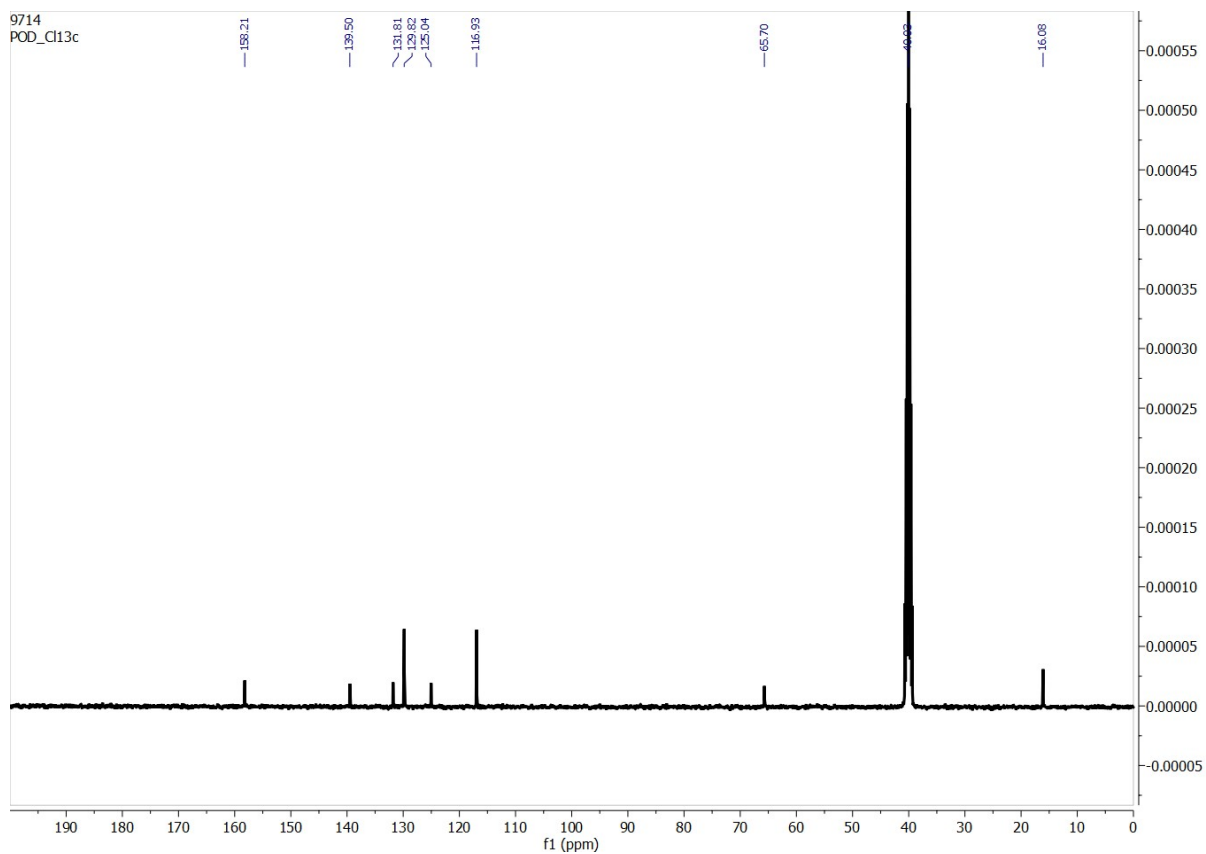

Fig. S5.  $^{13}\text{C}$ -NMR spectrum of P2 in DMSO- $\text{D}_6$ .

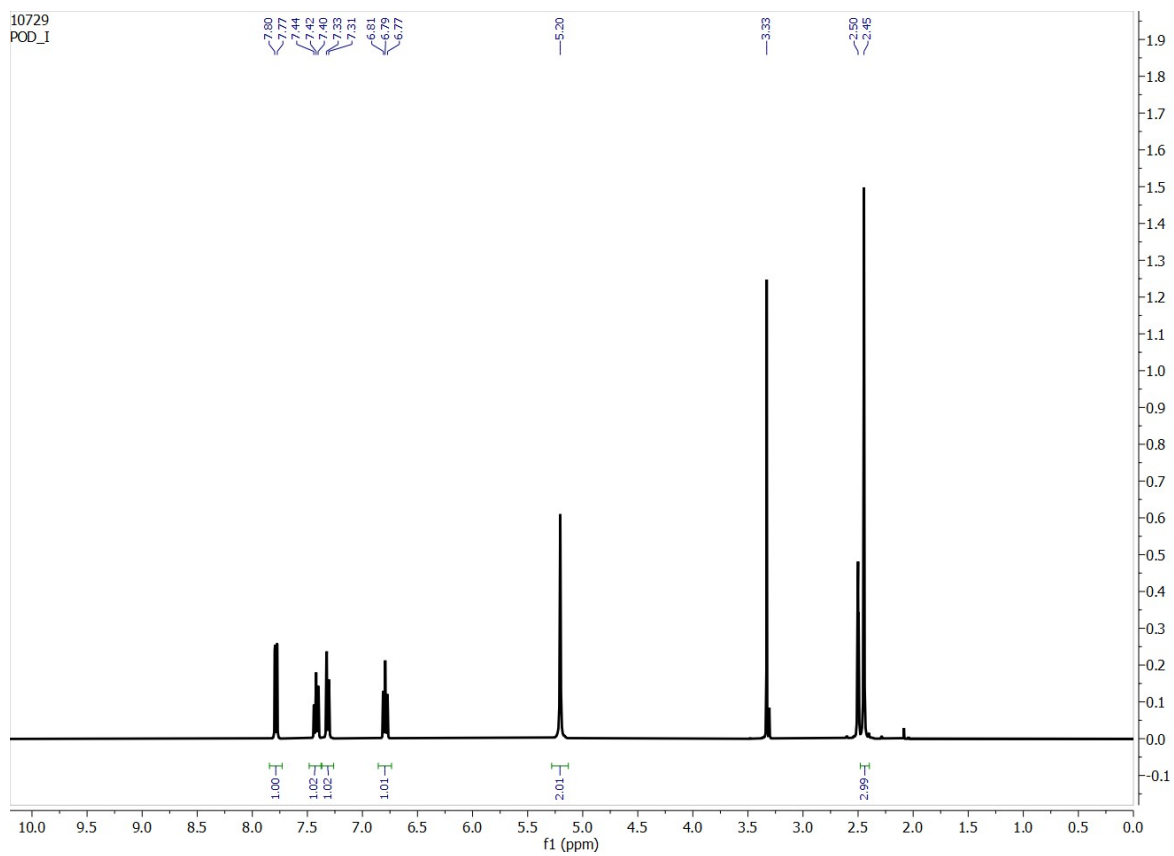

Fig. S6.  $^1\text{H}$ -NMR spectrum of P5 in DMSO- $\text{D}_6$ .

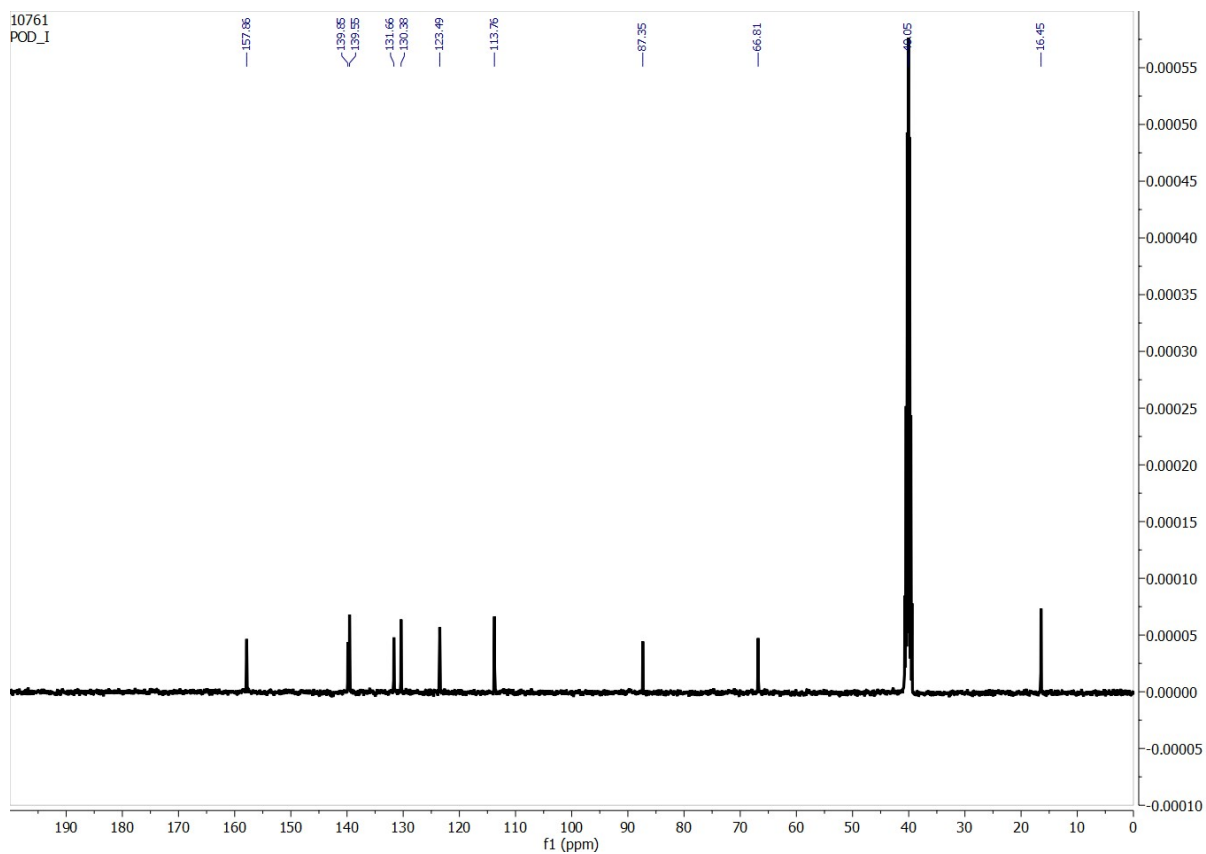

Fig. S7.  $^{13}\text{C}$ -NMR spectrum of P5 in  $\text{DMSO-D}_6$ .

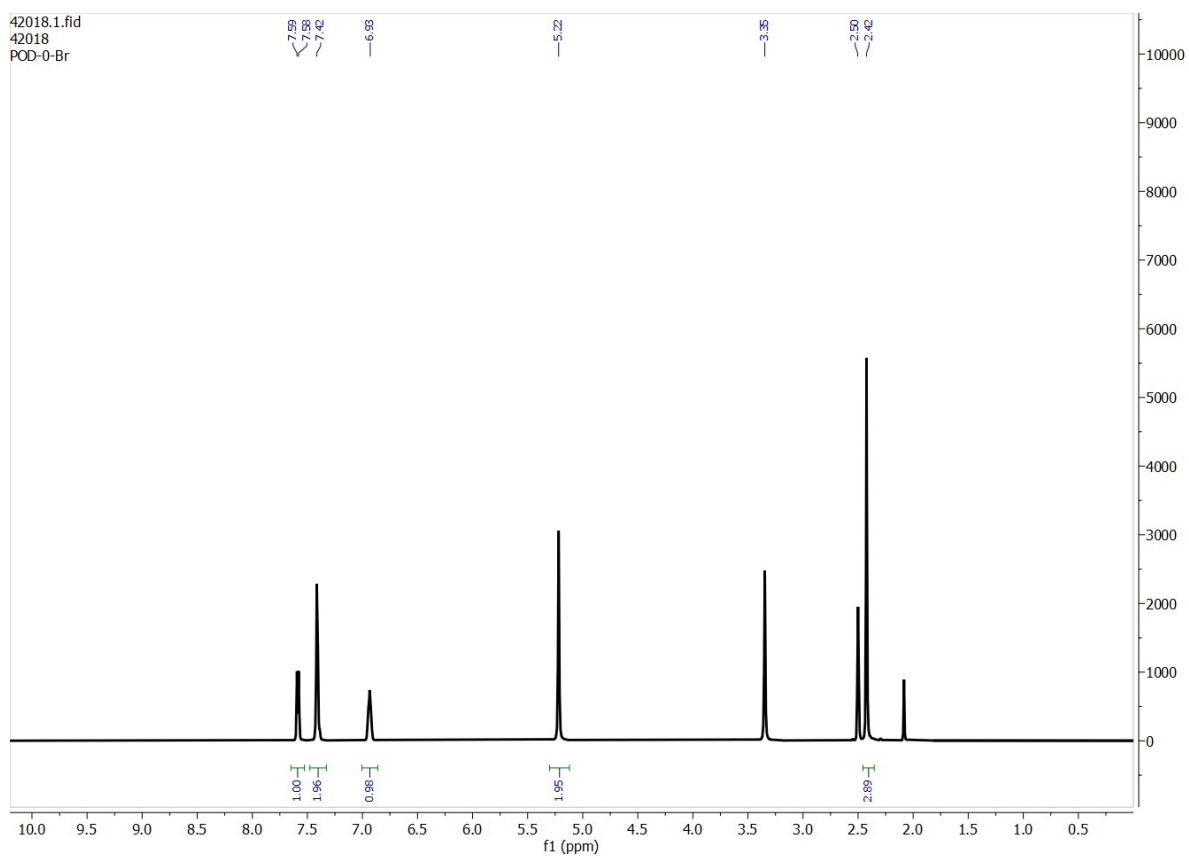

Fig. S8.  $^1\text{H}$ -NMR spectrum of P6 in  $\text{DMSO-D}_6$ .

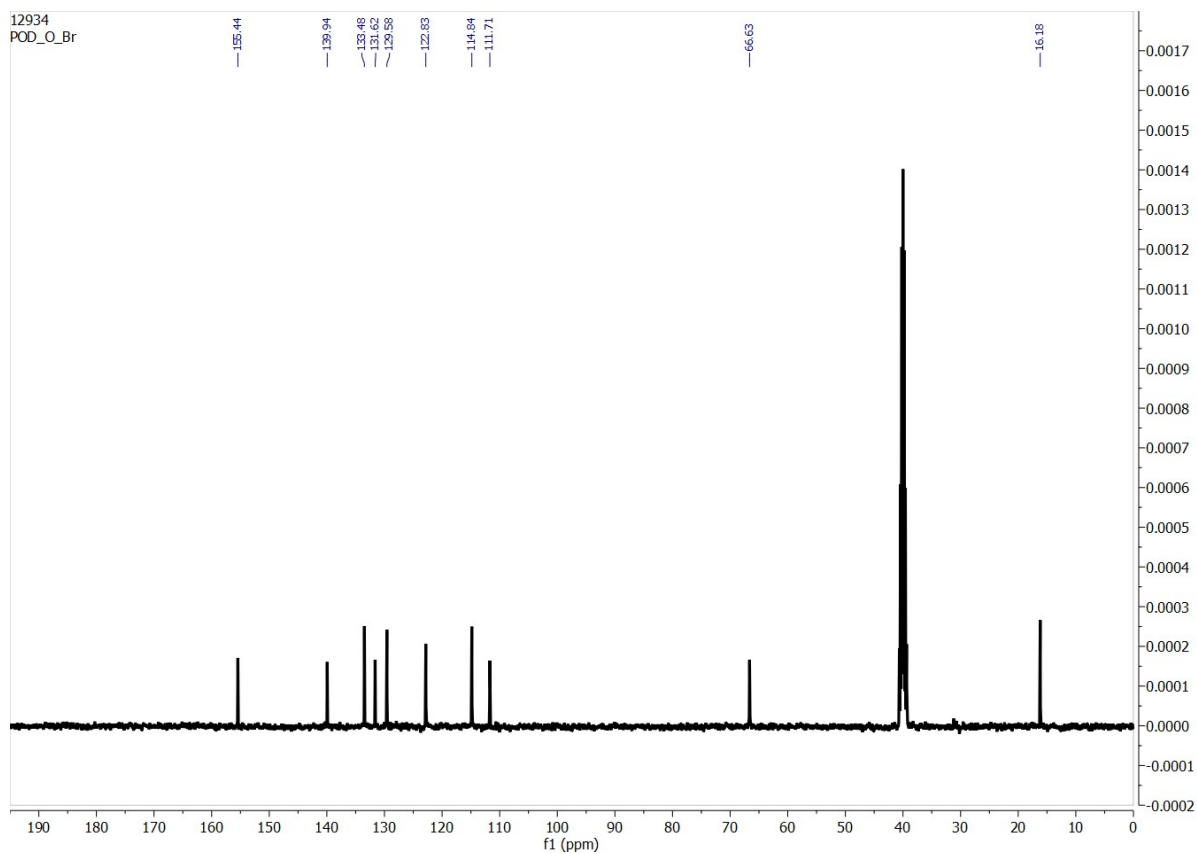

Fig. S9.  $^{13}\text{C}$ -NMR spectrum of P6 in DMSO- $\text{D}_6$ .

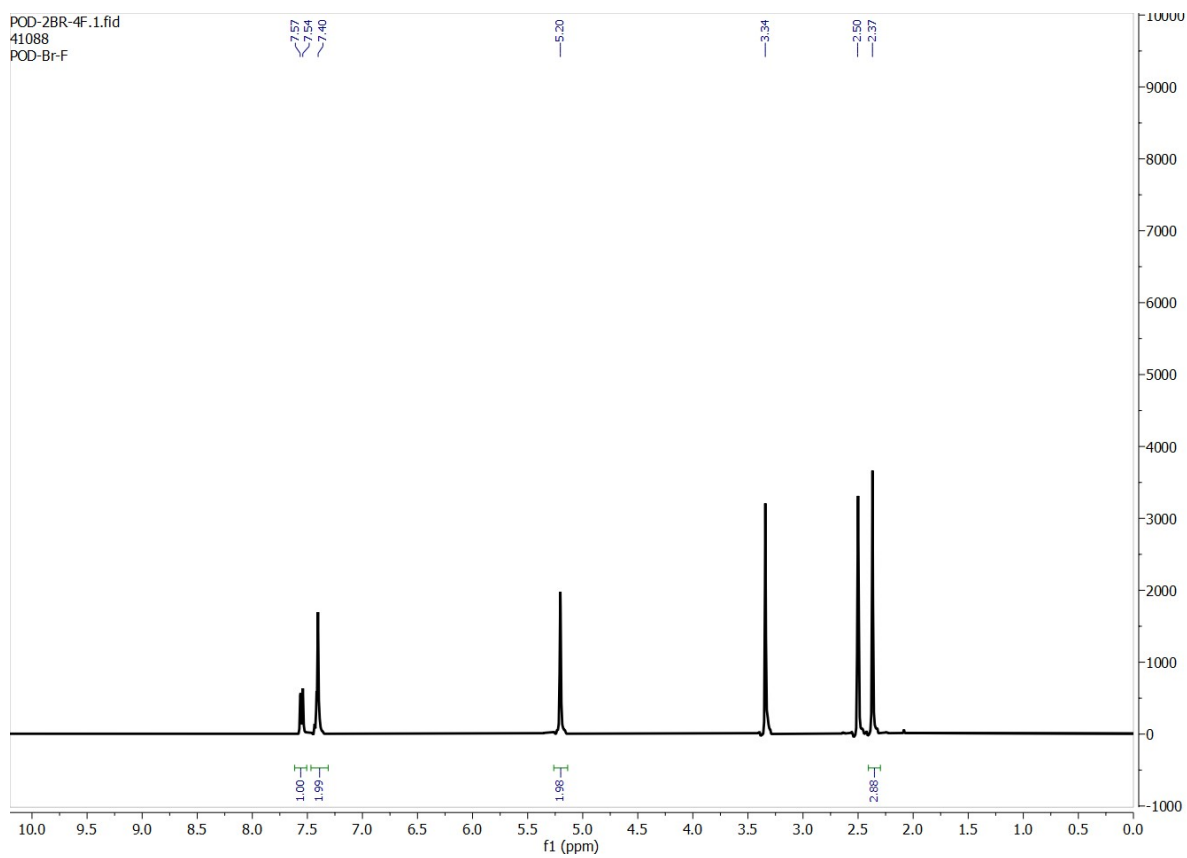

Fig. S10.  $^1\text{H}$ -NMR spectrum of P7 in DMSO- $\text{D}_6$ .

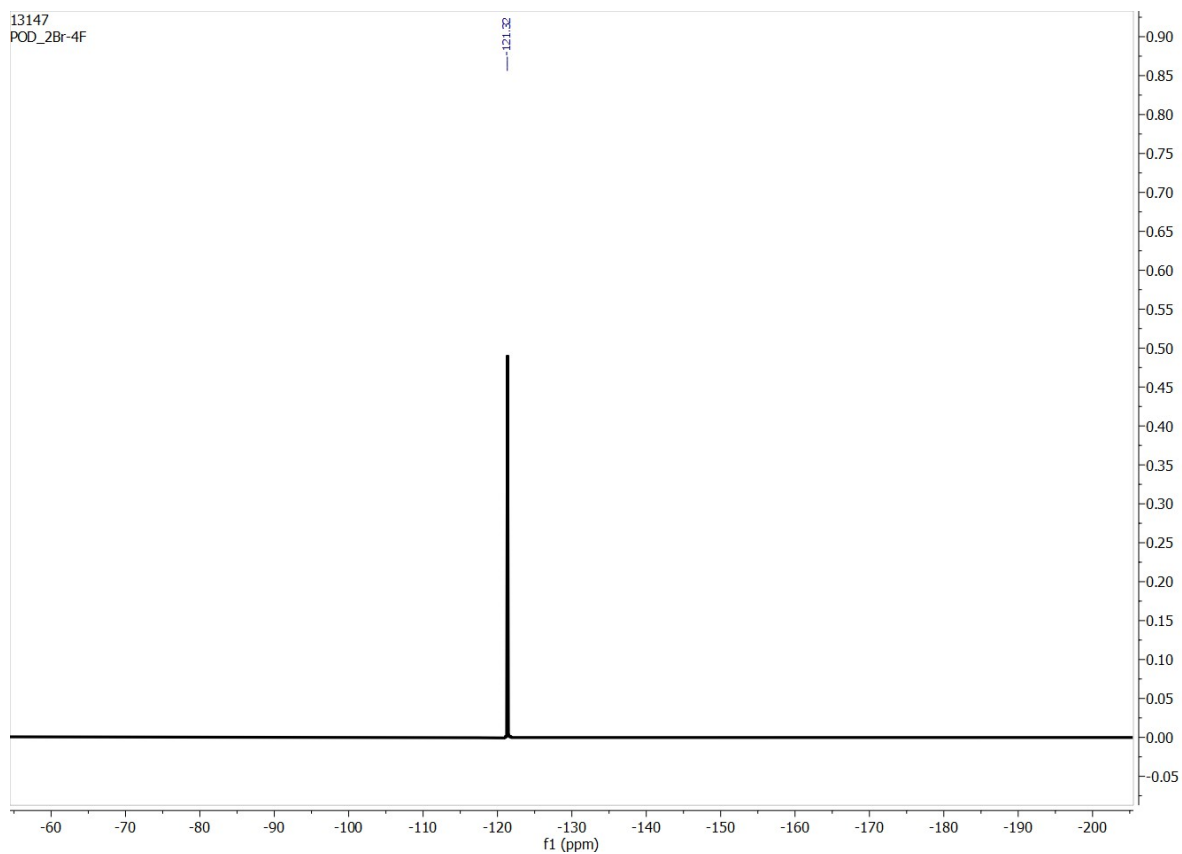

**Fig. S11.**  $^{19}\text{F}$ -NMR spectrum of **P7** in  $\text{DMSO-D}_6$ .

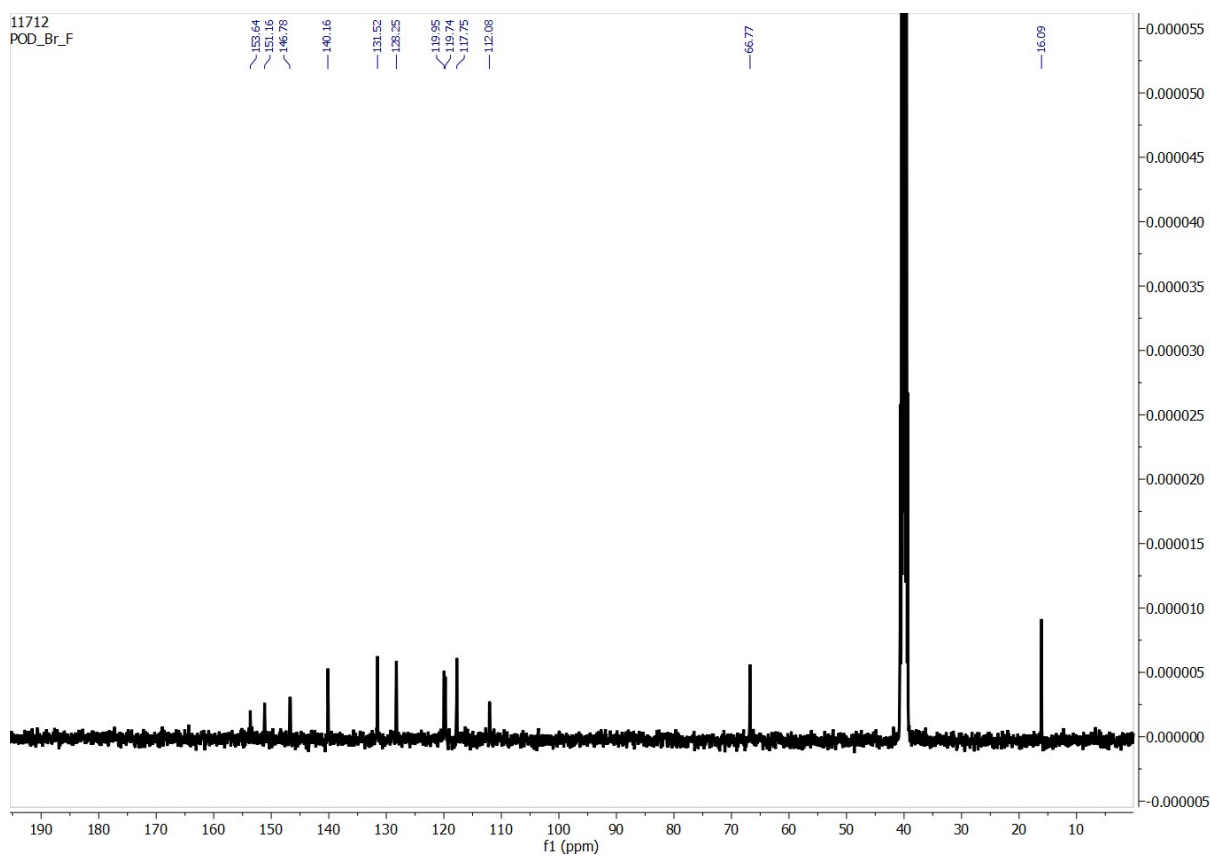

**Fig. S12.**  $^{13}\text{C}$ -NMR spectrum of **P7** in  $\text{DMSO-D}_6$ .

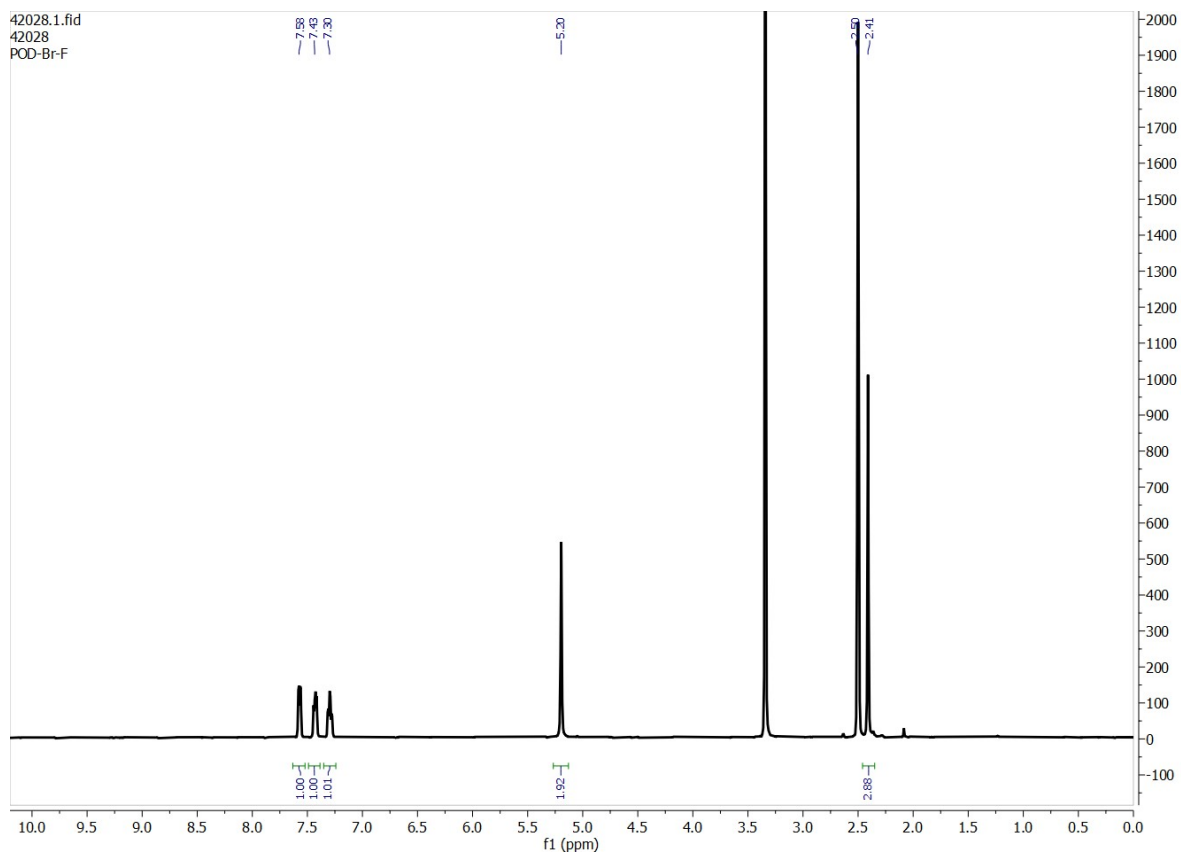

**Fig. S13.**  $^1\text{H}$ -NMR spectrum of **P8** in  $\text{DMSO-D}_6$ .

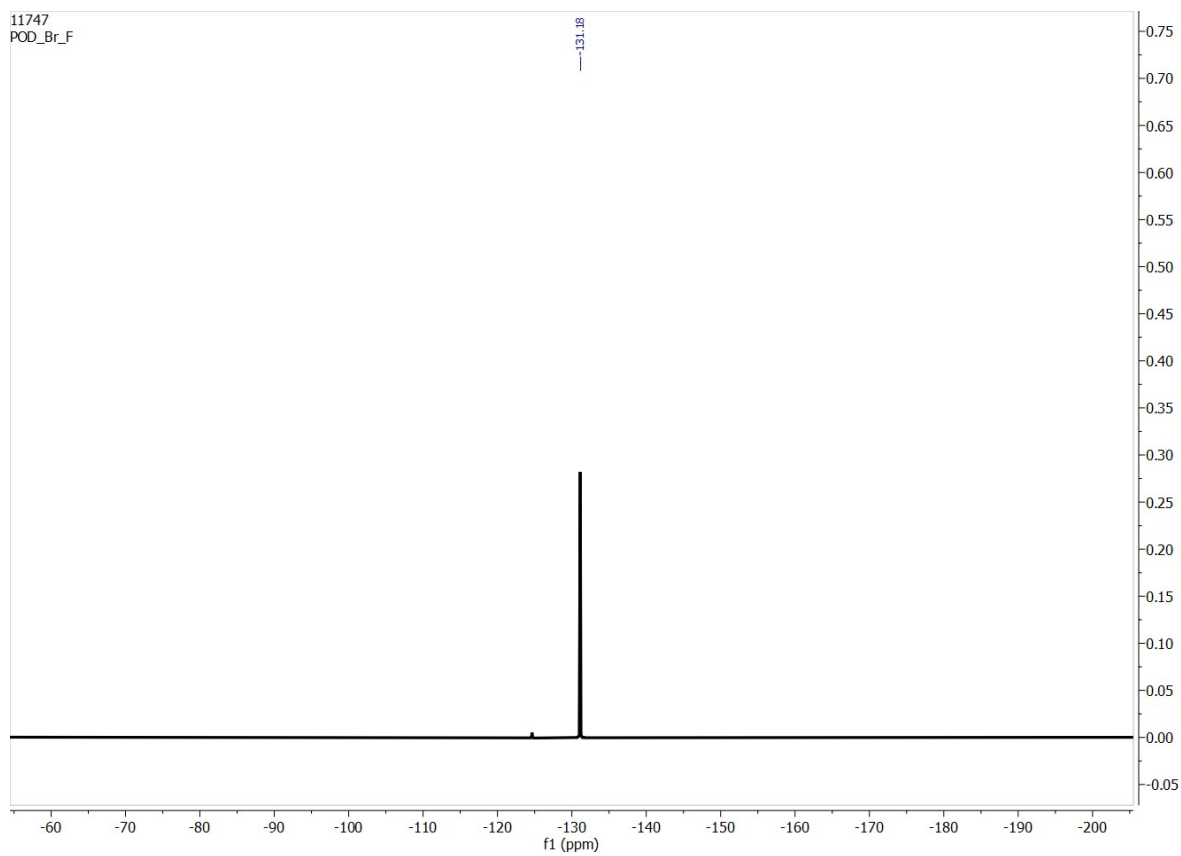

**Fig. S14.**  $^{19}\text{F}$ -NMR spectrum of **P8** in  $\text{DMSO-D}_6$ .



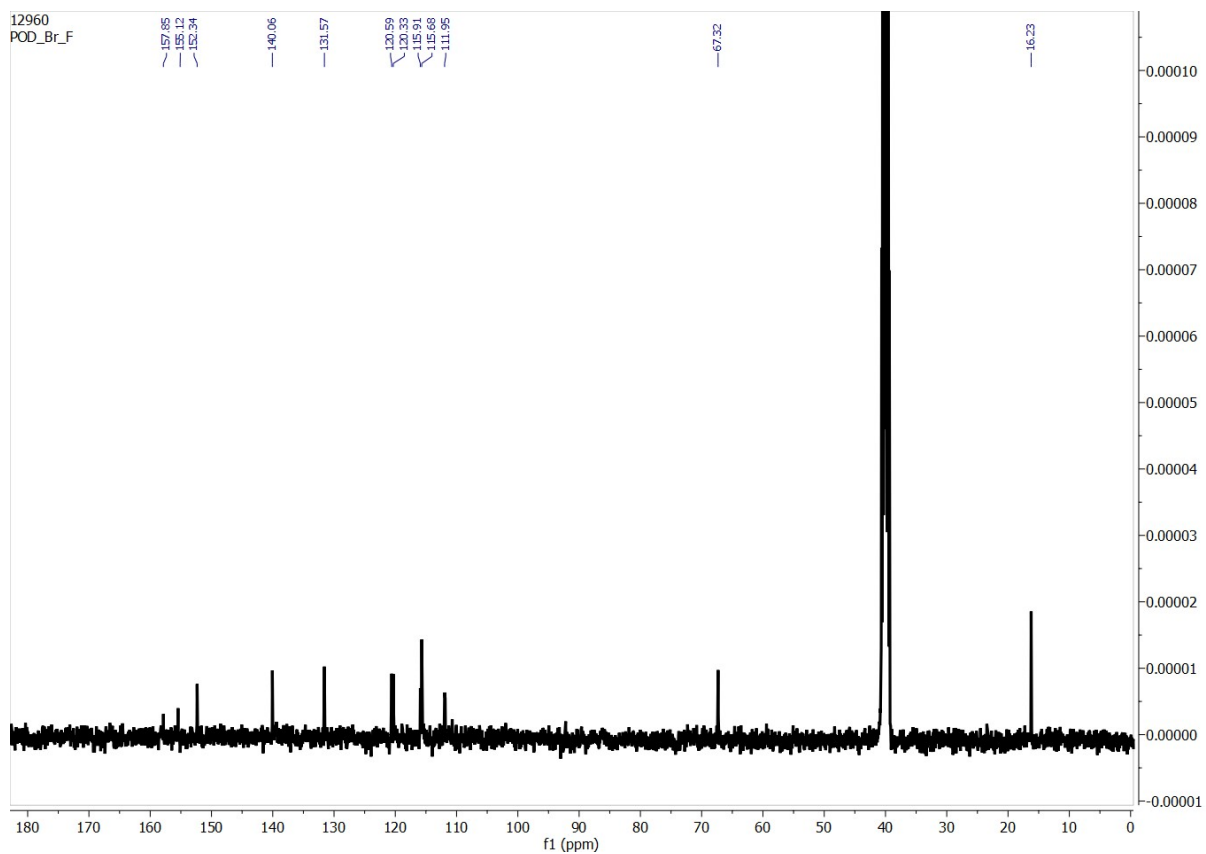

Fig. S15.  $^{13}\text{C}$ -NMR spectrum of P8 in  $\text{DMSO-D}_6$ .

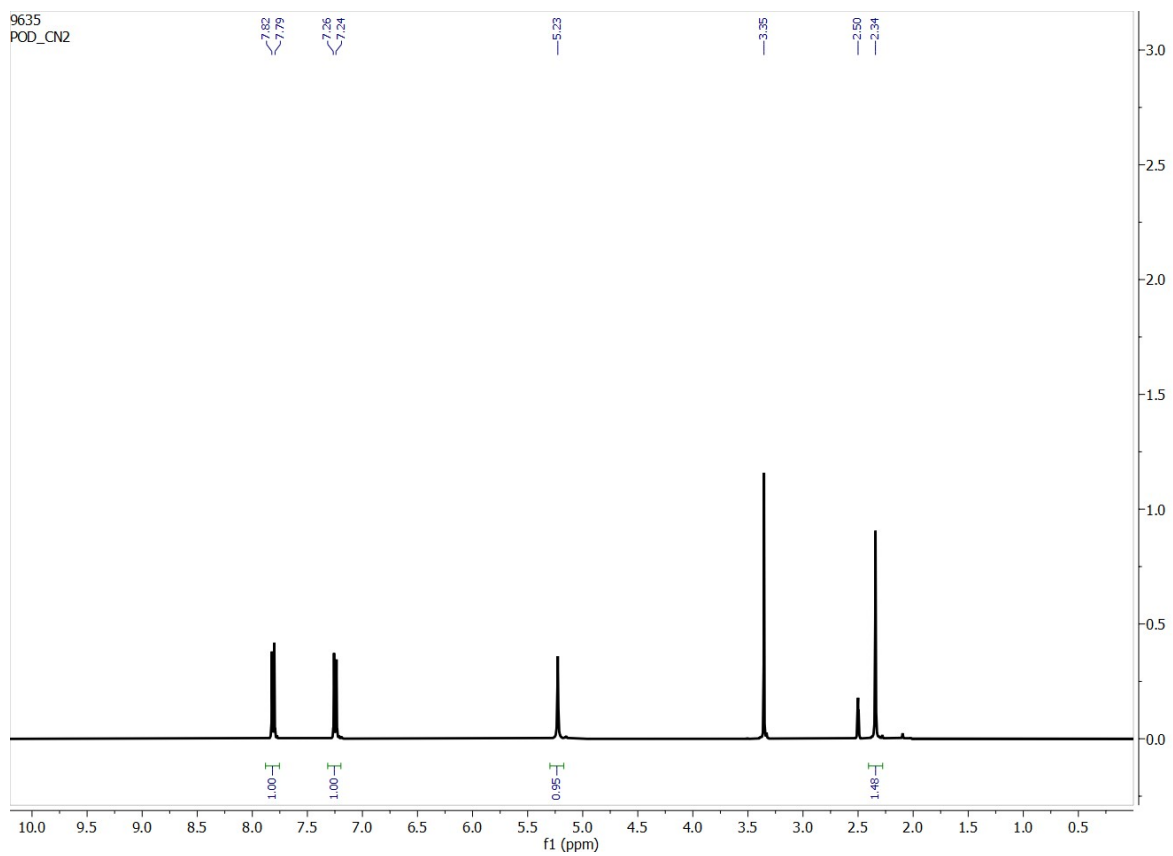

Fig. S16.  $^1\text{H}$ -NMR spectrum of P9 in  $\text{DMSO-D}_6$ .

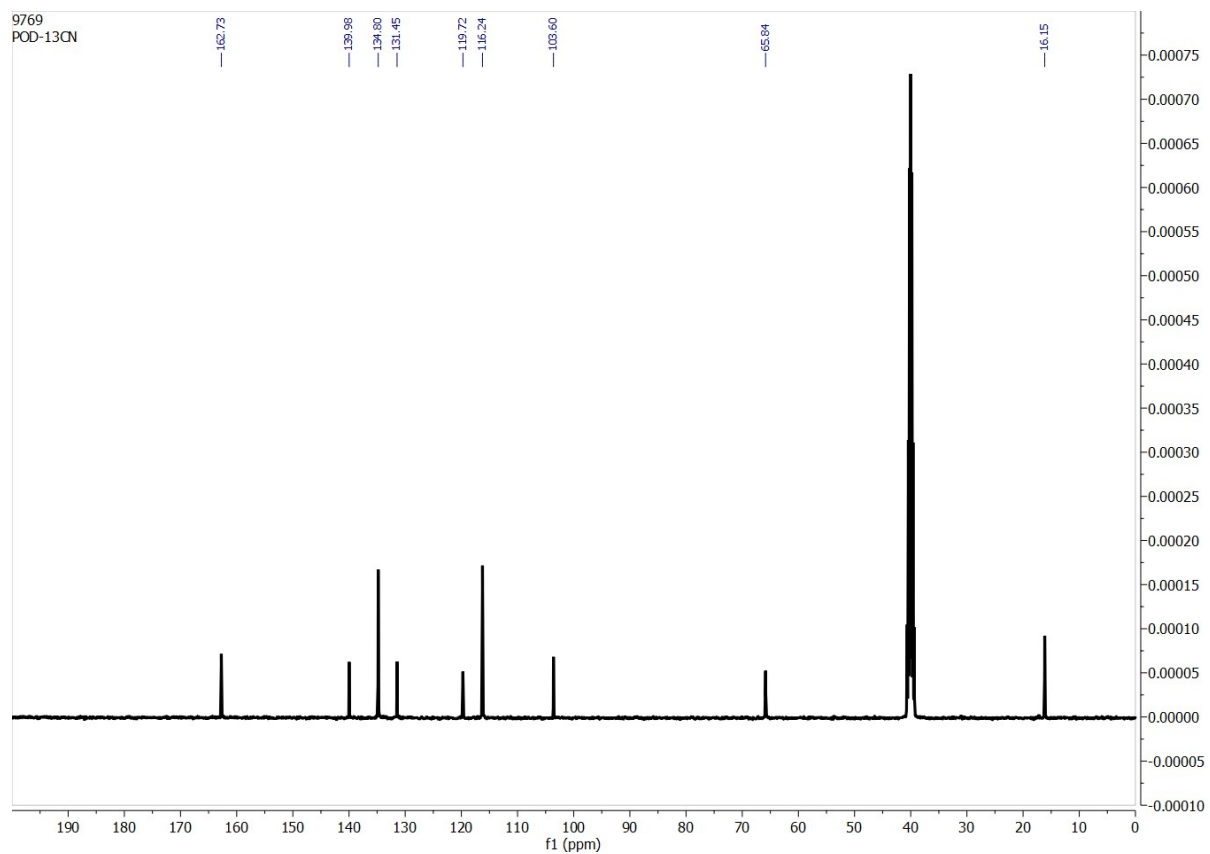

**Fig. S17.**  $^{13}\text{C}$ -NMR spectrum of **P9** in  $\text{DMSO-D}_6$ .

### 3. X-ray diffraction studies of podand crystals

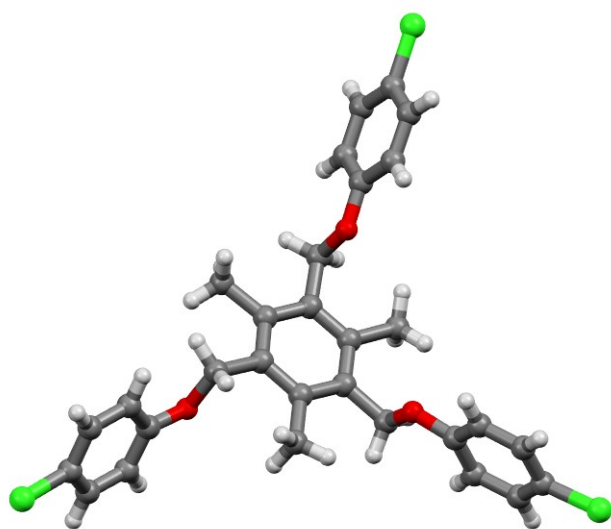

Fig. S18. Asymmetric unit of the single crystal X-ray structure of **P2**.

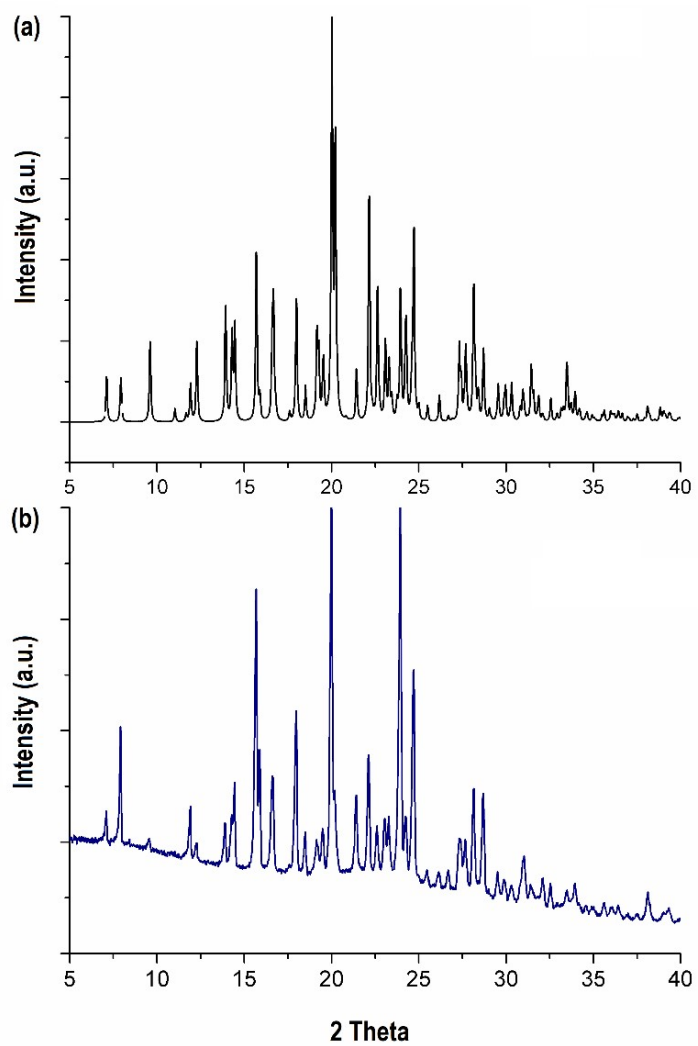

Fig. S19. (a) Simulated powder X-ray diffraction patterns of **P2**, and (b) experimental powder X-ray diffraction patterns of the bulk crystals of **P2** after drying.

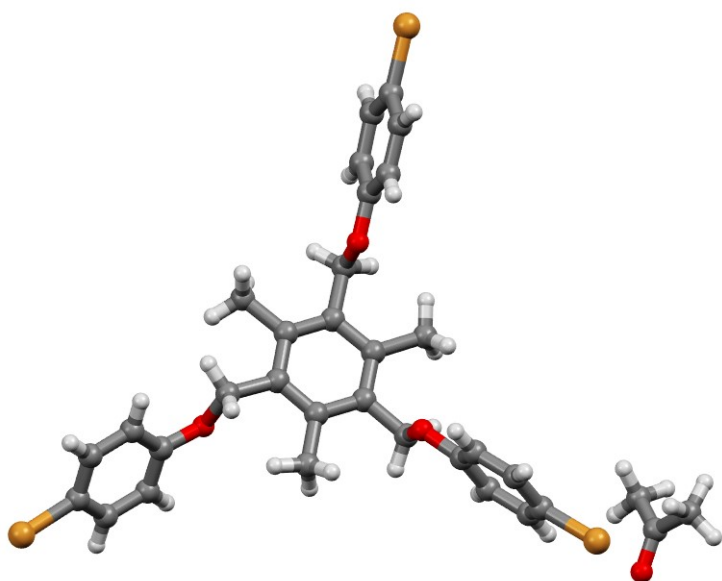

Fig. S20. Asymmetric unit of the single crystal X-ray structure of  $[\text{P3}\cdot(\text{CH}_3)_2\text{CO}]$ .

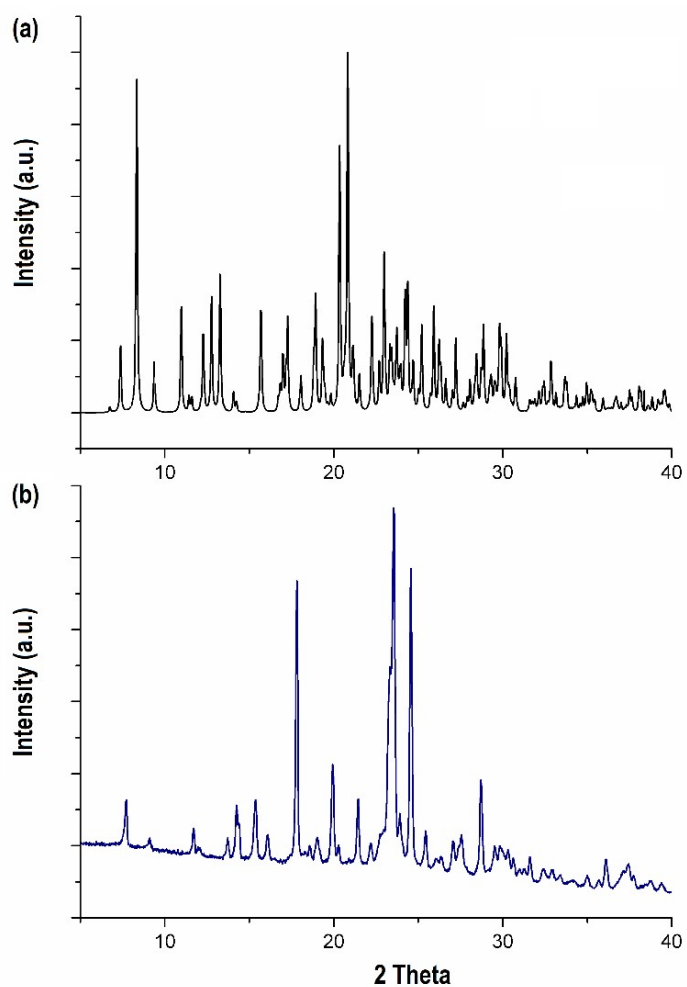

Fig. S21. (a) Simulated powder X-ray diffraction patterns of  $[\text{P3}\cdot(\text{CH}_3)_2\text{CO}]$ , and (b) experimental powder X-ray diffraction patterns of the bulk crystals of  $[\text{P3}\cdot(\text{CH}_3)_2\text{CO}]$  after drying.

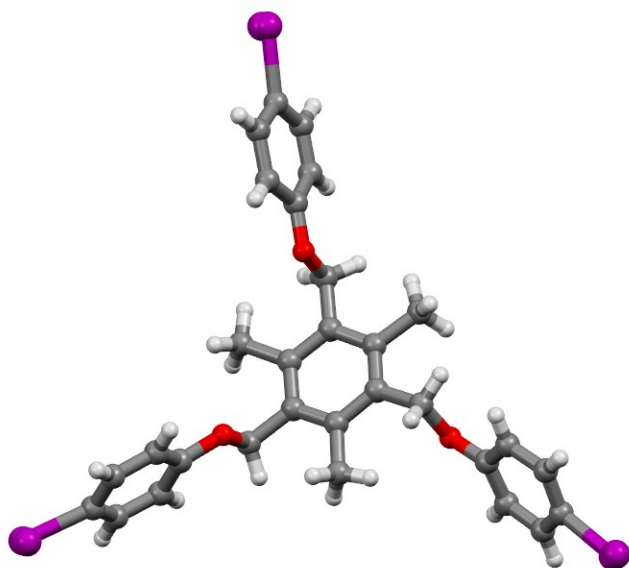

**Fig. S22.** Asymmetric unit of the single crystal X-ray structure of [**P4-solvent**].

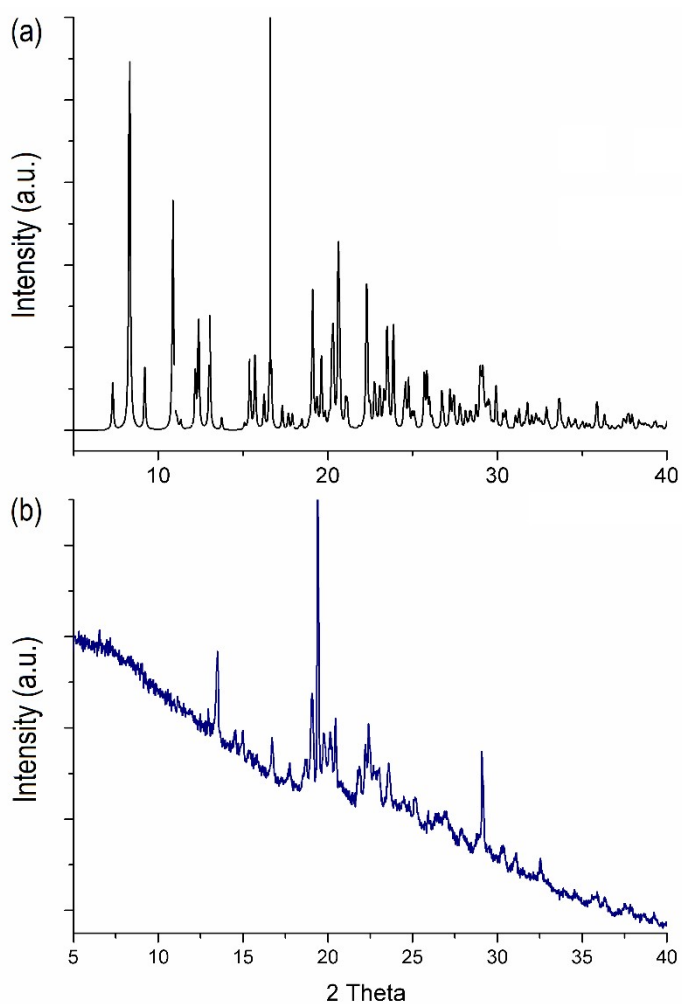

**Fig. S23.** (a) Simulated powder X-ray diffraction patterns of [**P4-solvent**], and (b) experimental powder X-ray diffraction patterns of [**P4-solvent**] after drying.

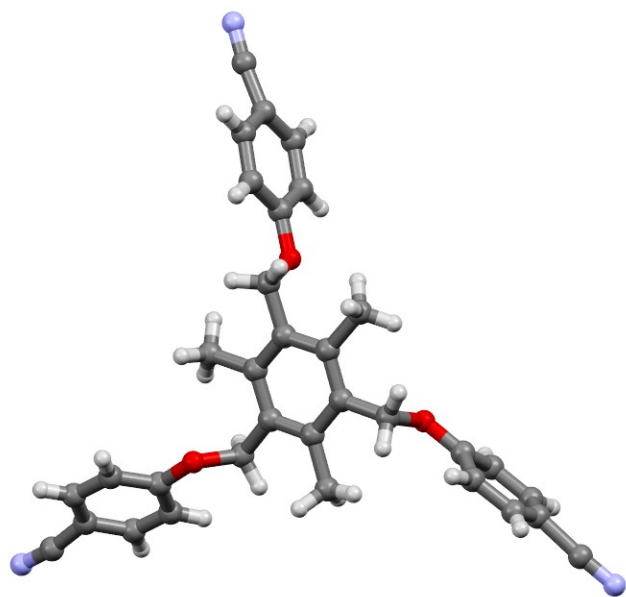

**Fig. S24.** Asymmetric unit of the single crystal X-ray structure of [**P9**-solvent].

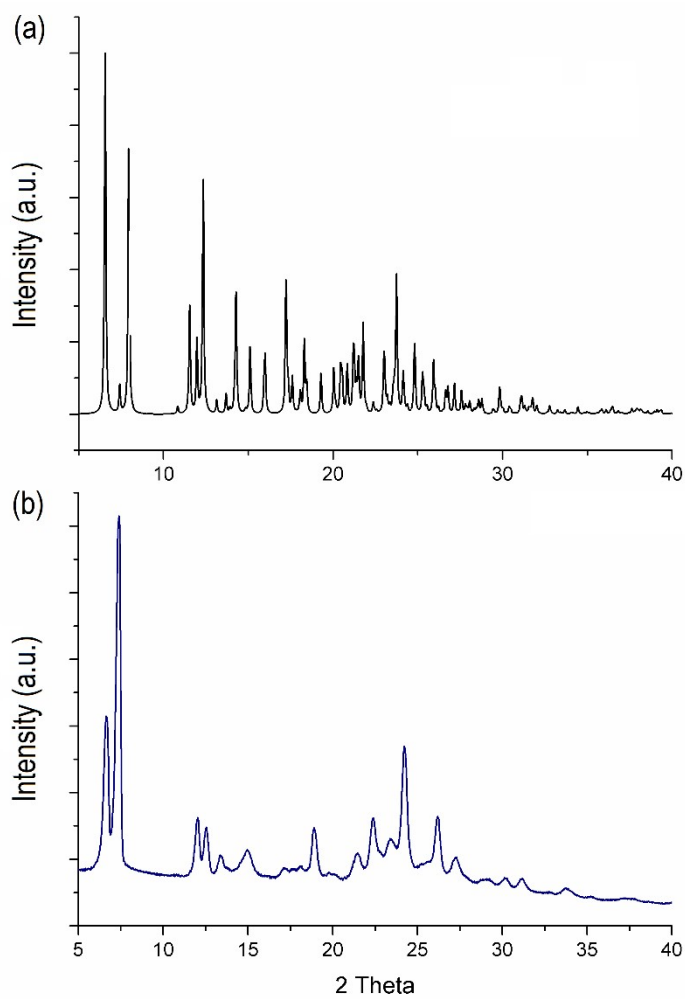

**Fig. S25.** (a) Simulated powder X-ray diffraction patterns of [**P9**-solvent], and (b) experimental powder X-ray diffraction patterns of [**P9**-solvent] after drying.

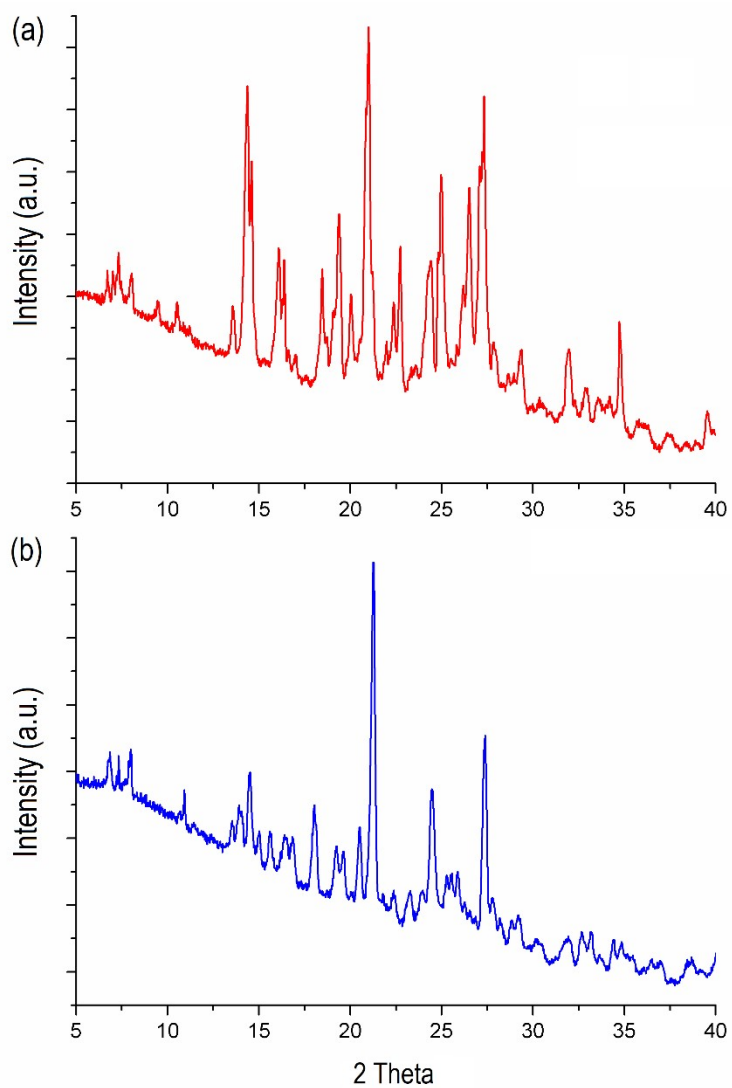

**Fig. S26.** (a) Experimental powder X-ray diffraction patterns of **P5** crystals obtained from acetone, (b) experimental powder X-ray diffraction patterns of **P6** crystals obtained from acetone.

**Table S1.** C-H hydrogen bond parameters observed in the crystal structures of ethereal podands.

| Podands                                    | C-H...A (A = acceptor)    | C...A (Å) | H...A (Å) | <C-H...A (°) |
|--------------------------------------------|---------------------------|-----------|-----------|--------------|
| <b>P2</b>                                  | C22-H22B...O2             | 3.506(3)  | 2.66      | 145          |
|                                            | C28-H...O2                | 3.679(3)  | 2.78      | 161          |
|                                            | C22-H22A...π (mesitylene) | 3.550     | 2.81      | 133          |
|                                            | C3-H3...π (PhCl3)         | 3.581     | 2.71      | 155          |
|                                            | C15-H15...π (mesitylene)  | 3.495     | 2.58      | 166          |
|                                            | C30-H30B...π (PhCl3)      | 4.130     | 3.20      | 162          |
|                                            |                           |           |           |              |
| <b>[P3·(CH<sub>3</sub>)<sub>2</sub>CO]</b> | C24-H24B...O1             | 3.587(1)  | 2.70      | 150          |
|                                            | C26-H26...O1              | 3.721(1)  | 2.81      | 165          |
|                                            | C24-H24A...π (mesitylene) | 3.539     | 2.86      | 127          |
|                                            | C19-H19...π (PhBr3)       | 3.659     | 2.84      | 146          |
|                                            | C2-H2...π (mesitylene)    | 3.554     | 2.67      | 158          |
|                                            | C13-H13C...π (PhBr3)      | 3.681     | 2.87      | 141          |
|                                            | C23-H23...Br3             | 3.855     | 3.11      | 138          |
|                                            |                           |           |           |              |
| <b>[P4·solvent]</b>                        | C10-H10A...O2             | 3.572(1)  | 2.69      | 151          |
|                                            | C12-H12...O2              | 3.716(1)  | 2.82      | 161          |
|                                            | C10-H10A...π (mesitylene) | 3.530     | 2.86      | 127          |
|                                            | C30-H30...π (PhI1)        | 3.684     | 2.85      | 149          |
|                                            | C20-H20...π (mesitylene)  | 3.711     | 2.84      | 156          |
|                                            | C8-H8A...π (PhI1)         | 4.015     | 3.31      | 131          |
|                                            | C26-H26...I1              | 3.881     | 3.12      | 140          |
|                                            |                           |           |           |              |
| <b>[P9·solvent]</b>                        | C14-H14C...O1             | 3.544(5)  | 2.65      | 153          |
|                                            | C17-H17A...N1             | 3.392(2)  | 2.43      | 175          |
|                                            | C28-H28...N2              | 3.602(2)  | 2.68      | 172          |
|                                            | C14-H14B...N3             | 3.555(2)  | 2.69      | 151          |
|                                            | C23-H23...C33 (-CN)       | 3.654(2)  | 2.85      | 145          |



#### 4. Thermogravimetry analysis of crystals under nitrogen atmosphere

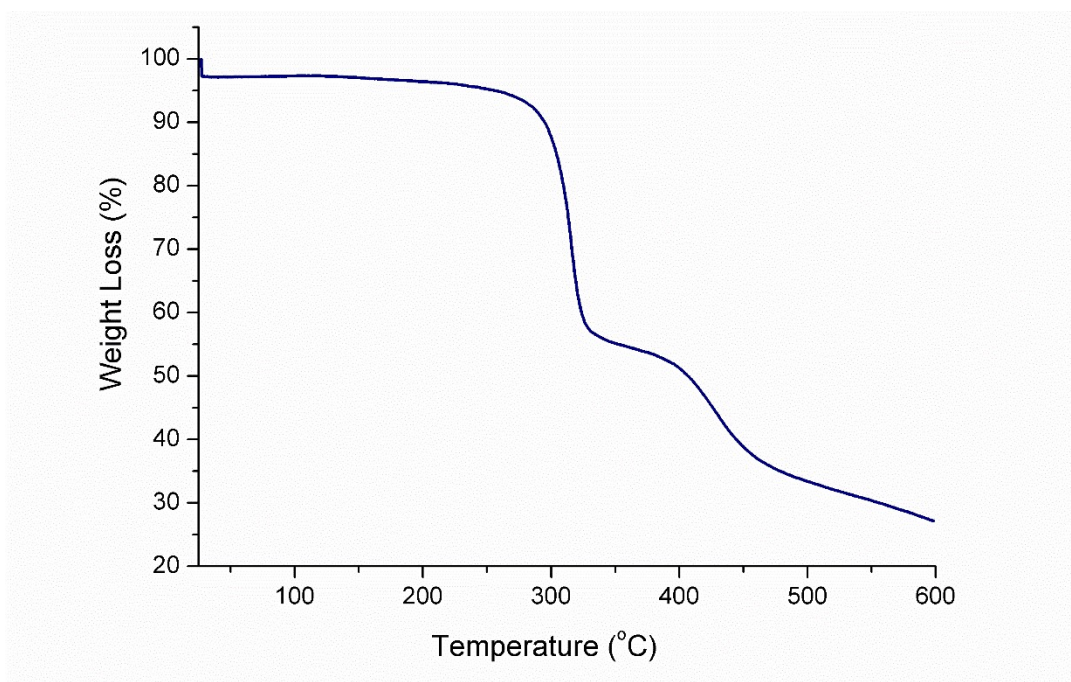

Fig. S27. Thermogravimetric analysis of the crystals of **P1** obtained from acetone.

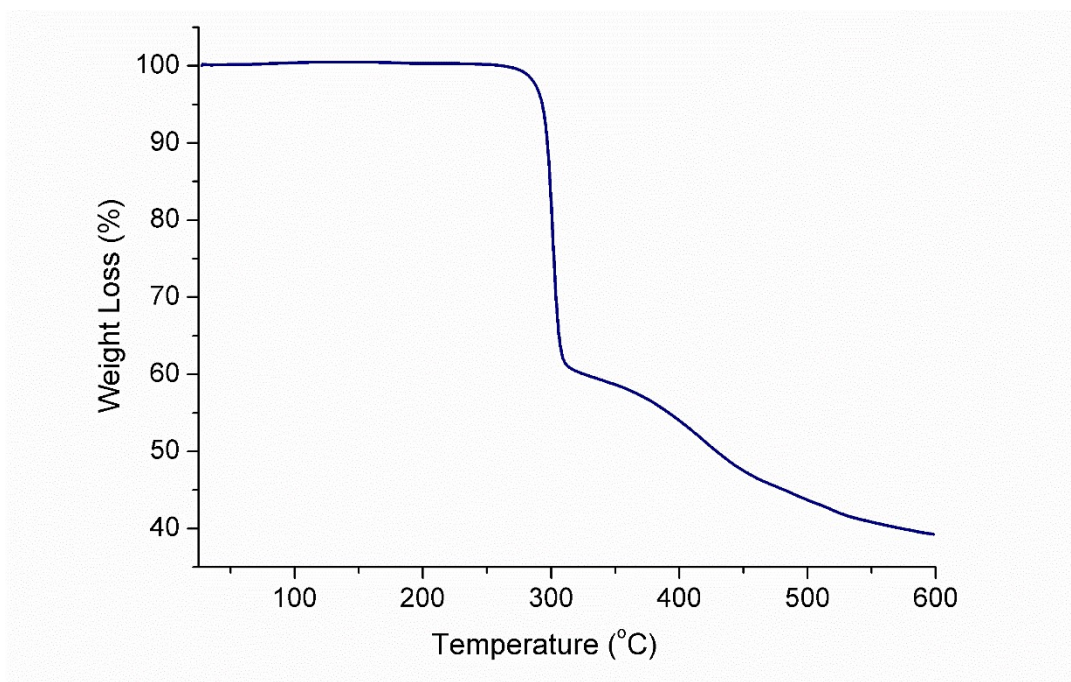

Fig. S28. Thermogravimetric analysis of the crystals of **P2** obtained from acetone-ethanol solvents (2:1, v/v).

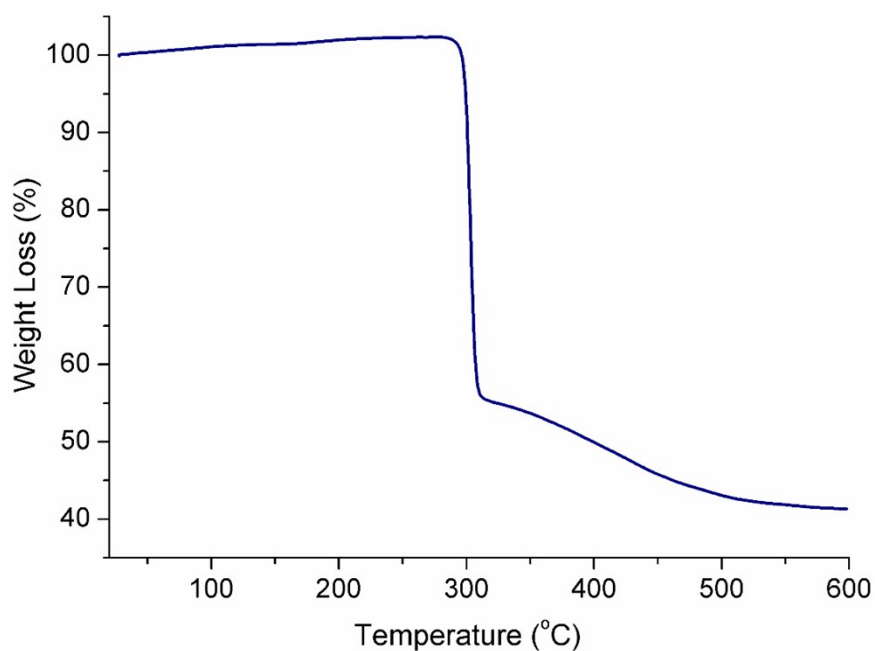

Fig. S29. Thermogravimetric analysis of the crystals of  $[P3 \cdot (CH_3)_2CO]$  obtained from acetone-ethanol (2:1, v/v).

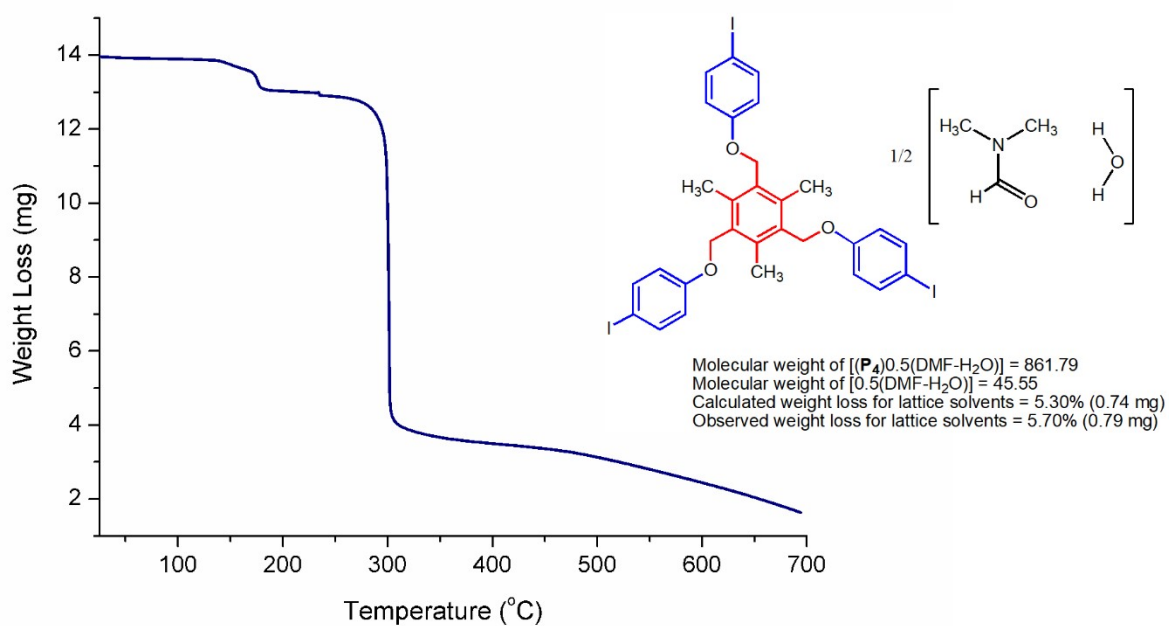

Fig. S30. Thermogravimetric analysis of the crystals of  $[P4 \cdot 0.5(DMF-H_2O)]$  obtained from acetone-DMF (2:1, v/v).

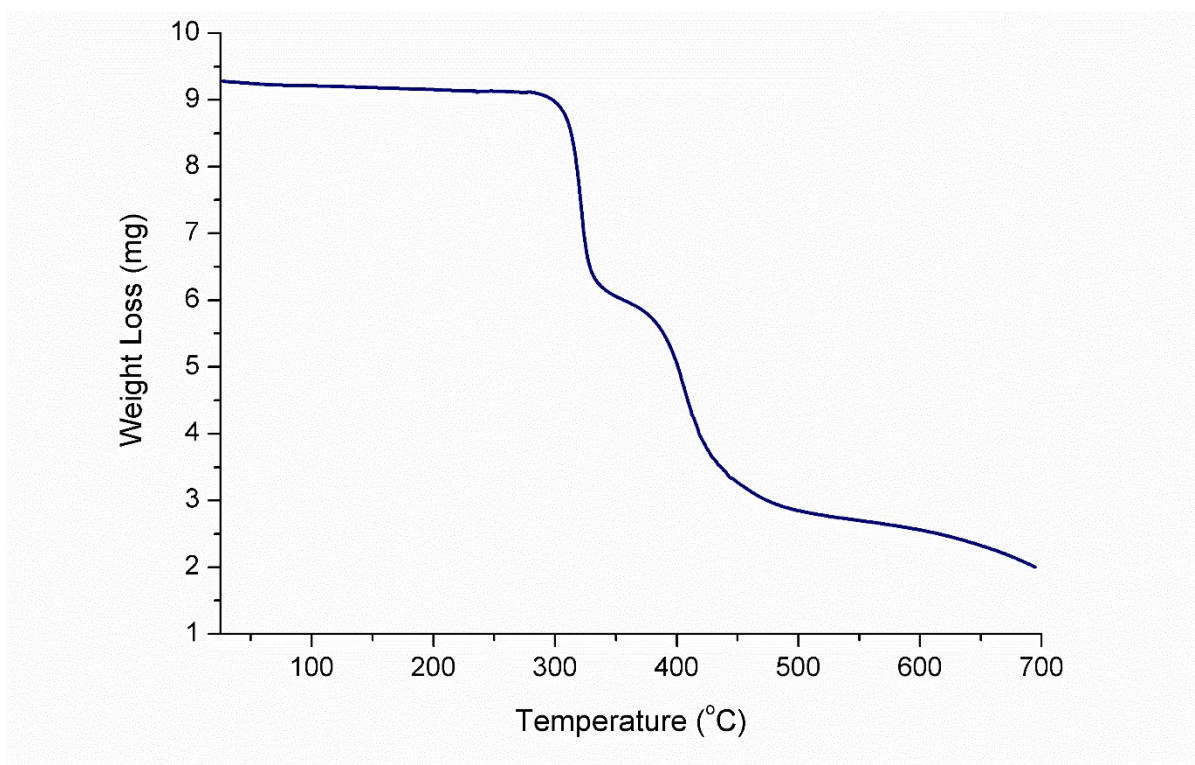

**Fig. S31.** Thermogravimetric analysis of the crystals of [P9-solvent] obtained from acetone-acetonitrile solution.

## 5. Hirshfeld surface analysis fingerprint plots

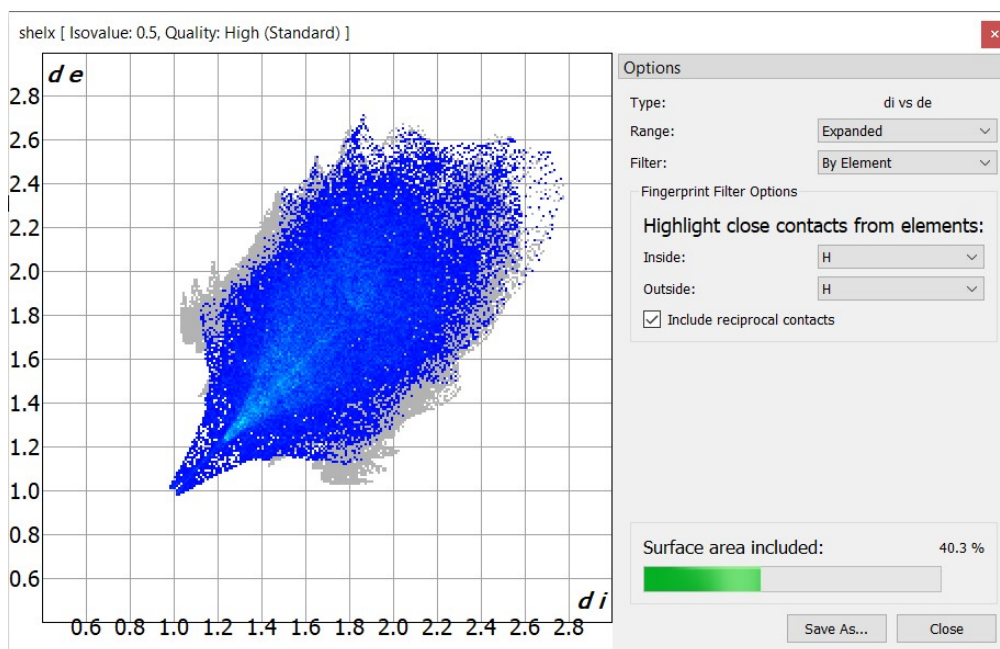

**Fig. S32.** Hirshfeld surface generated 2D fingerprint plot highlighting the relative contribution from H...H close contacts in the crystal structure of **P2**.

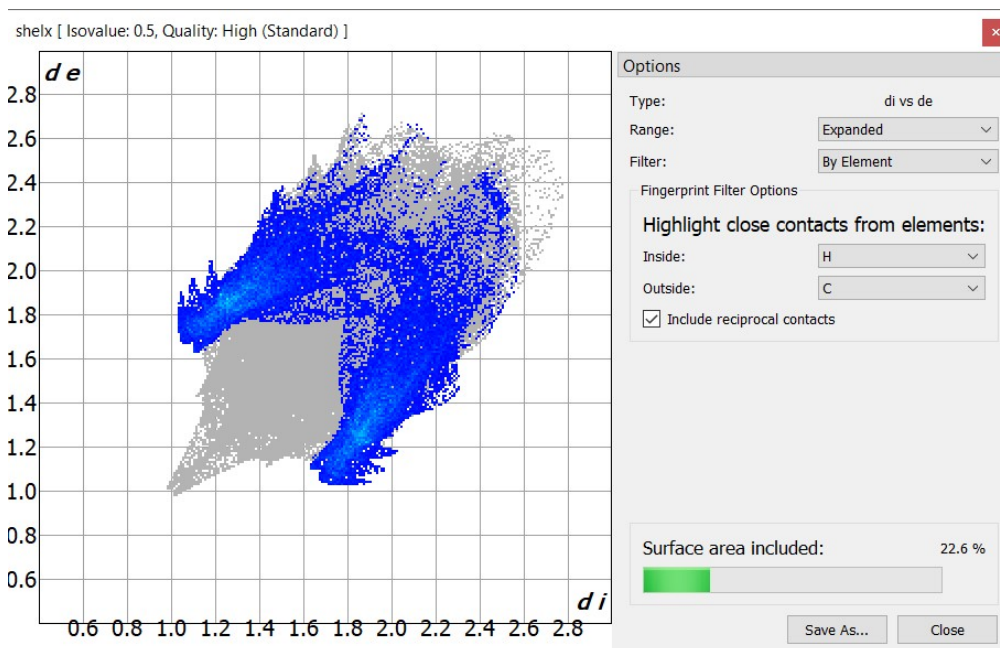

**Fig. S33.** Hirshfeld surface generated 2D fingerprint plot highlighting the relative contribution from H...C close contacts in the crystal structure of **P2**.



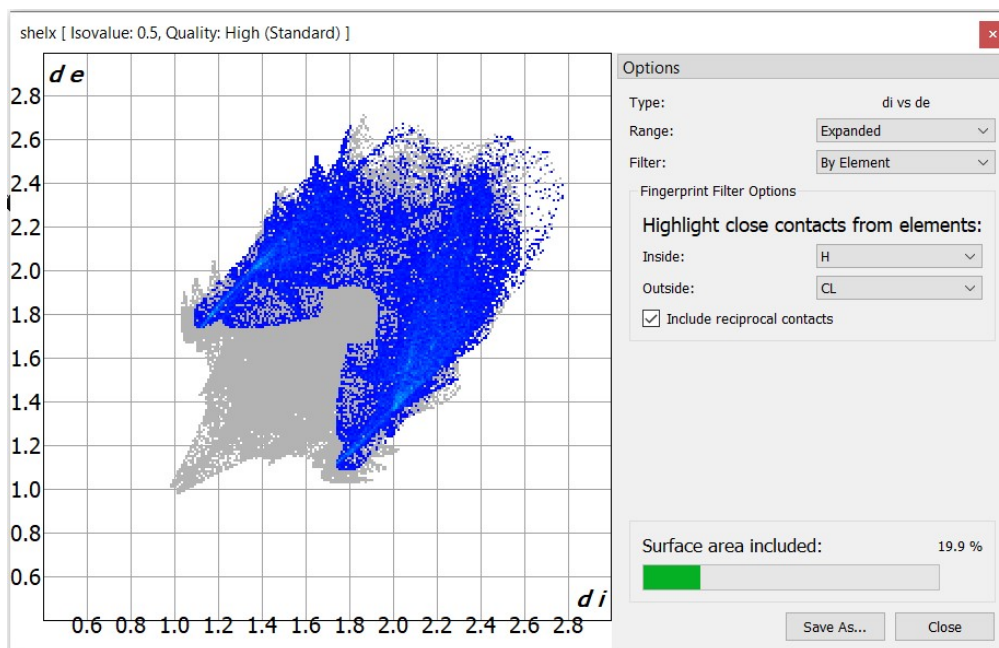

**Fig. S34.** Hirshfeld surface generated 2D fingerprint plot highlighting the relative contribution from H...Cl close contacts in the crystal structure of **P2**.

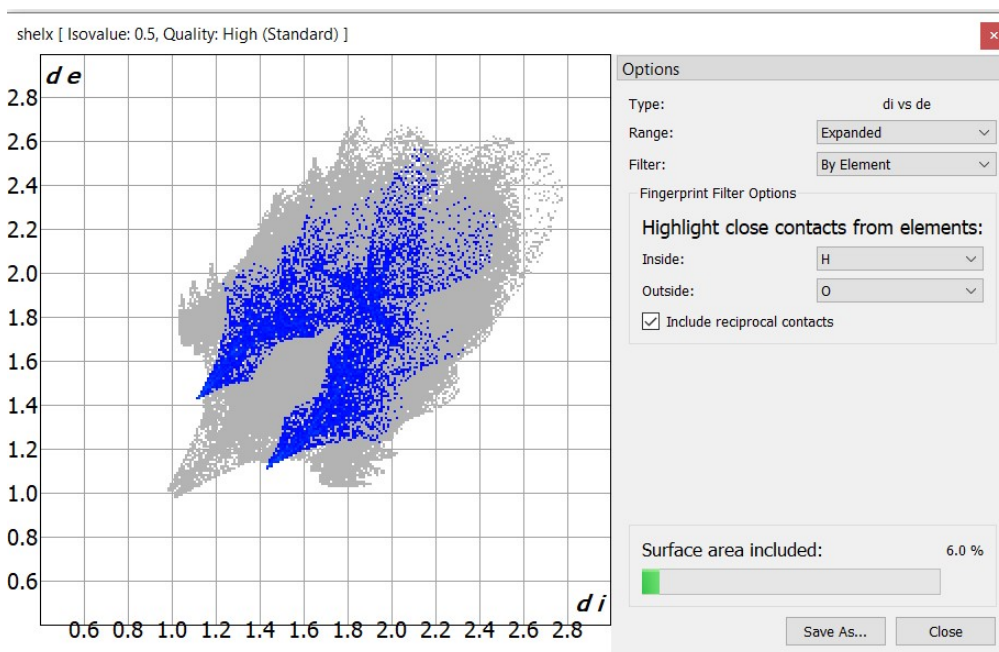

**Fig. S35.** Hirshfeld surface generated 2D fingerprint plot highlighting the relative contribution from H...O close contacts in the crystal structure of **P2**.

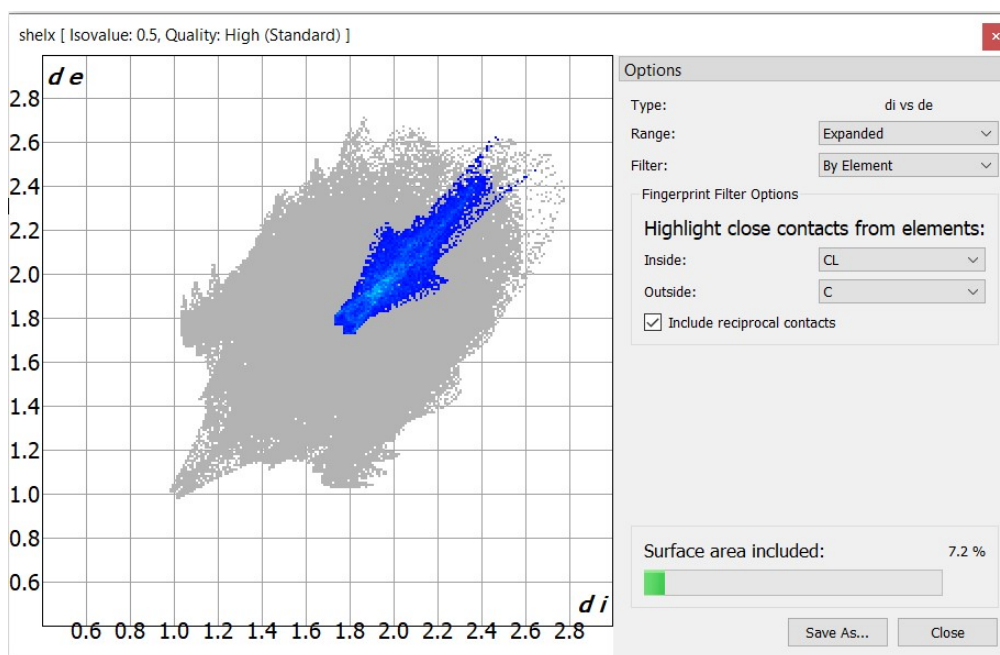

**Fig. S36.** Hirshfeld surface generated 2D fingerprint plot highlighting the relative contribution from Cl...C close contacts in the crystal structure of **P2**.

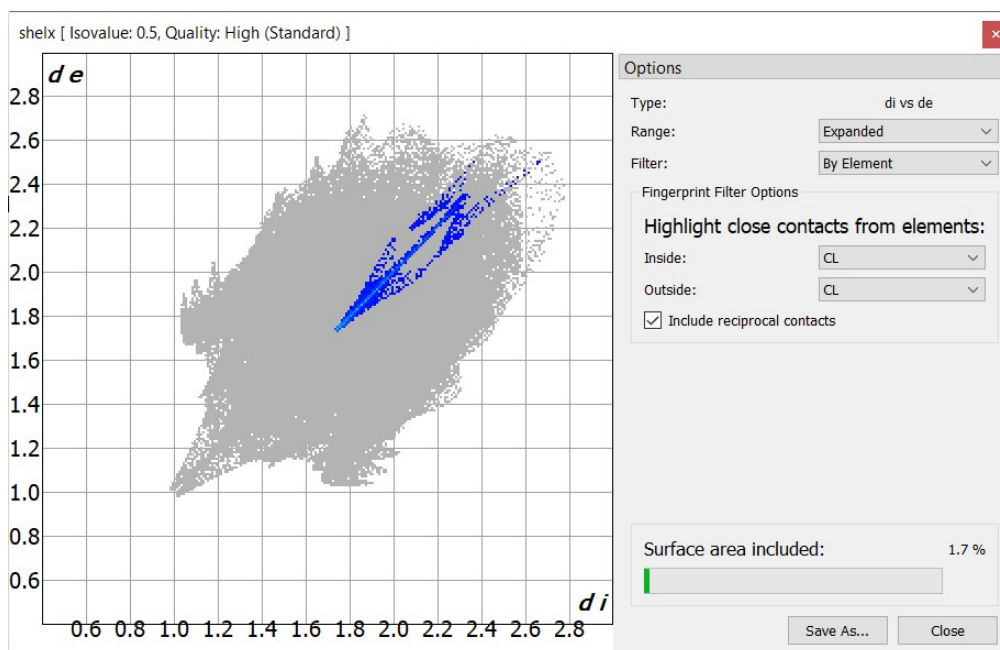

**Fig. S37.** Hirshfeld surface generated 2D fingerprint plot highlighting the relative contribution from Cl...Cl close contacts in the crystal structure of **P2**.

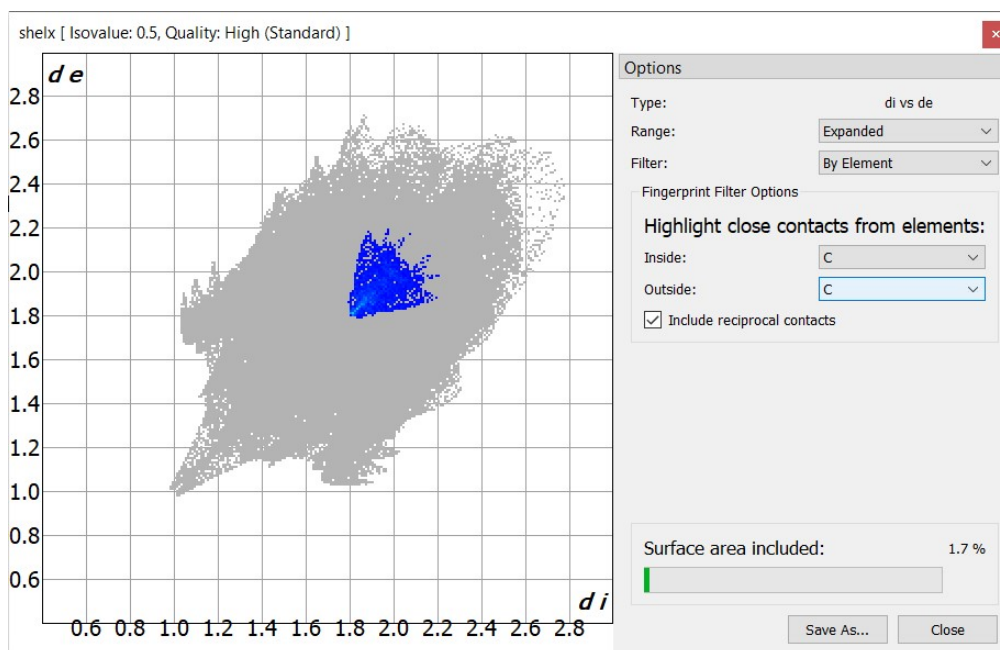

**Fig. S38.** Hirshfeld surface generated 2D fingerprint plot highlighting the relative contribution from C...C close contacts in the crystal structure of **P2**.

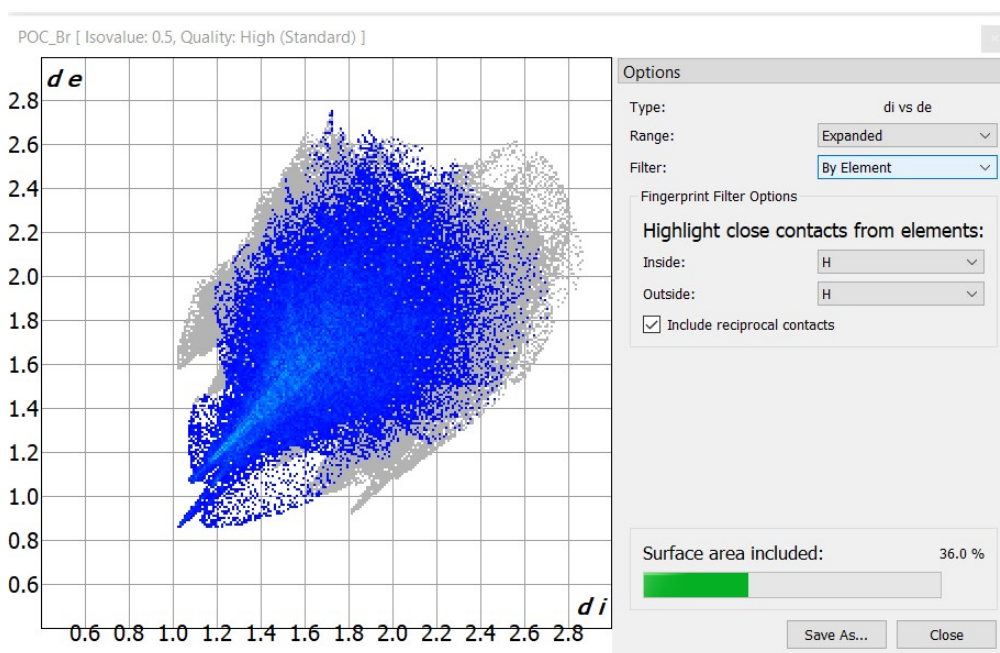

**Fig. S39.** Hirshfeld surface generated 2D fingerprint plot highlighting the relative contribution from H...H close contacts in the crystal structure of **[P3·(CH<sub>3</sub>)<sub>2</sub>CO]**.

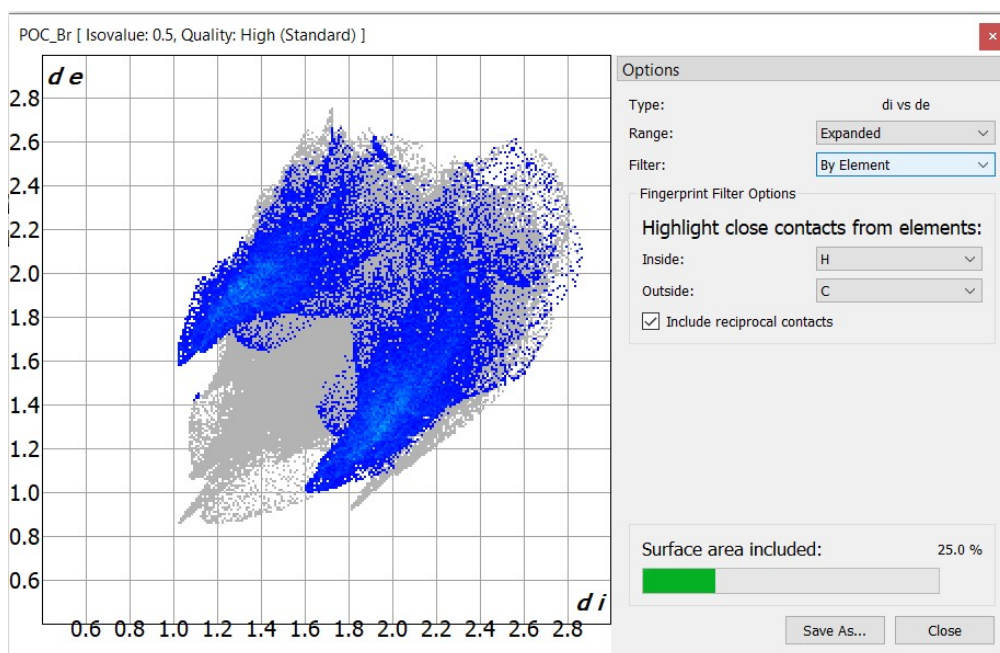

**Fig. S40.** Hirshfeld surface generated 2D fingerprint plot highlighting the relative contribution from H...C close contacts in the crystal structure of  $[\text{P3} \cdot (\text{CH}_3)_2\text{CO}]$ .

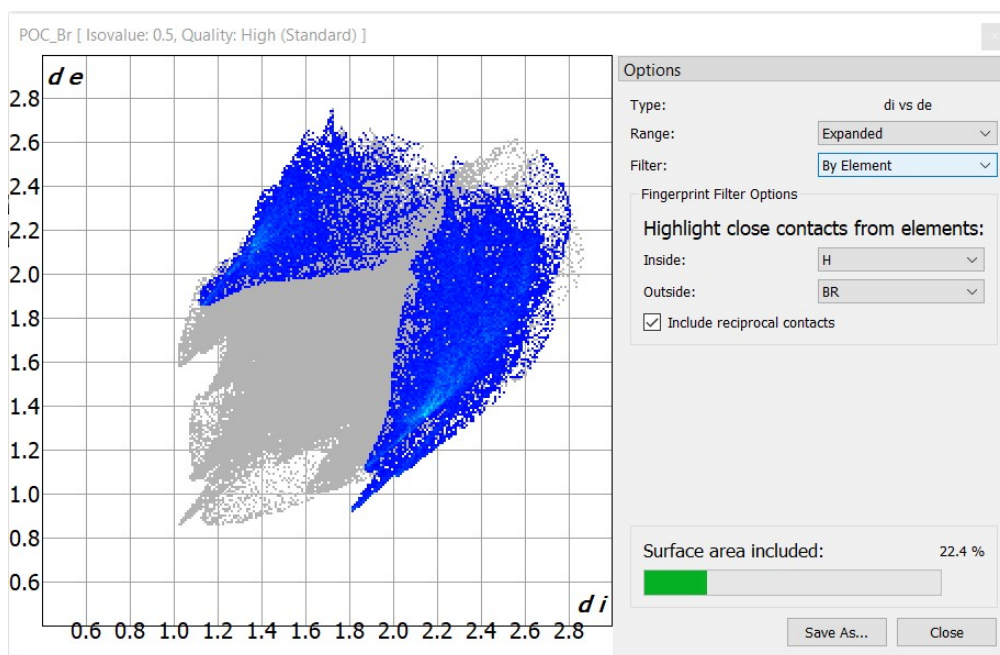

**Fig. S41.** Hirshfeld surface generated 2D fingerprint plot highlighting the relative contribution from H...Br close contacts in the crystal structure of  $[\text{P3} \cdot (\text{CH}_3)_2\text{CO}]$ .



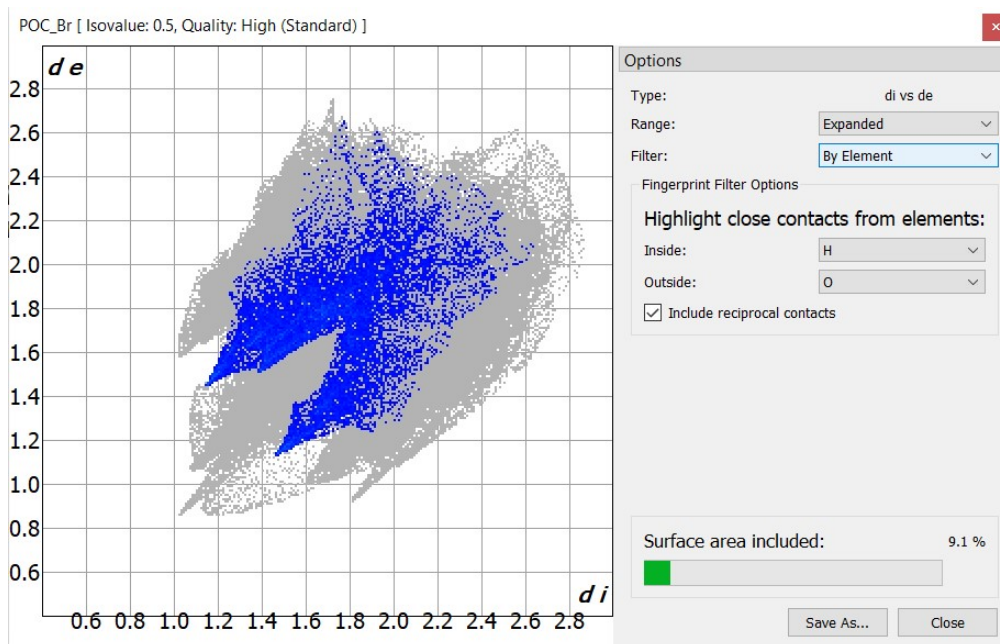

**Fig. S42.** Hirshfeld surface generated 2D fingerprint plot highlighting the relative contribution from H...O close contacts in the crystal structure of  $[P3 \cdot (CH_3)_2CO]$ .

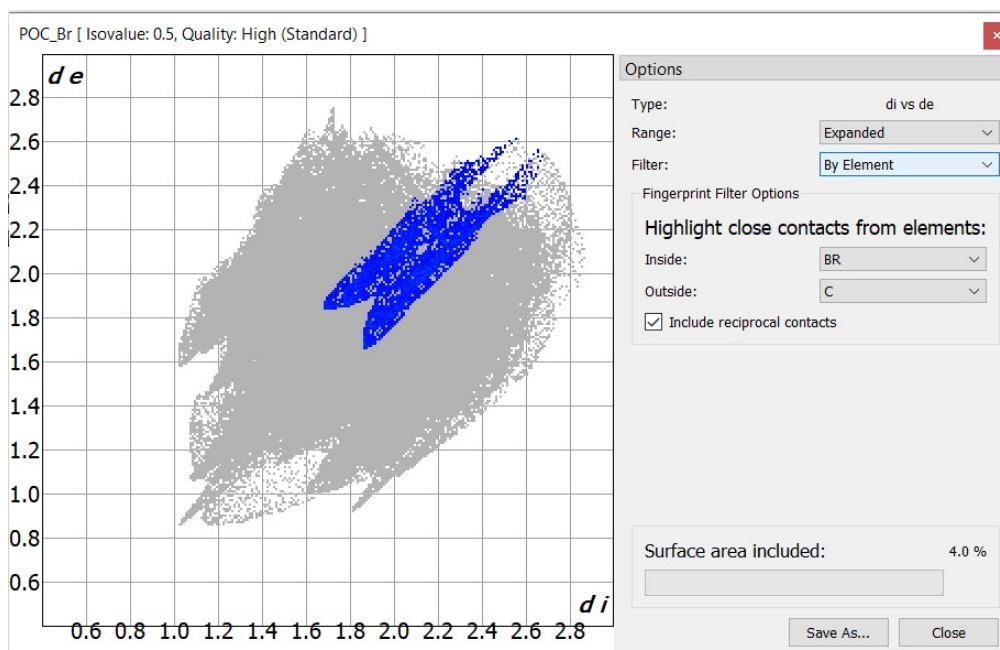

**Fig. S43.** Hirshfeld surface generated 2D fingerprint plot highlighting the relative contribution from Br...C close contacts in the crystal structure of  $[P3 \cdot (CH_3)_2CO]$ .

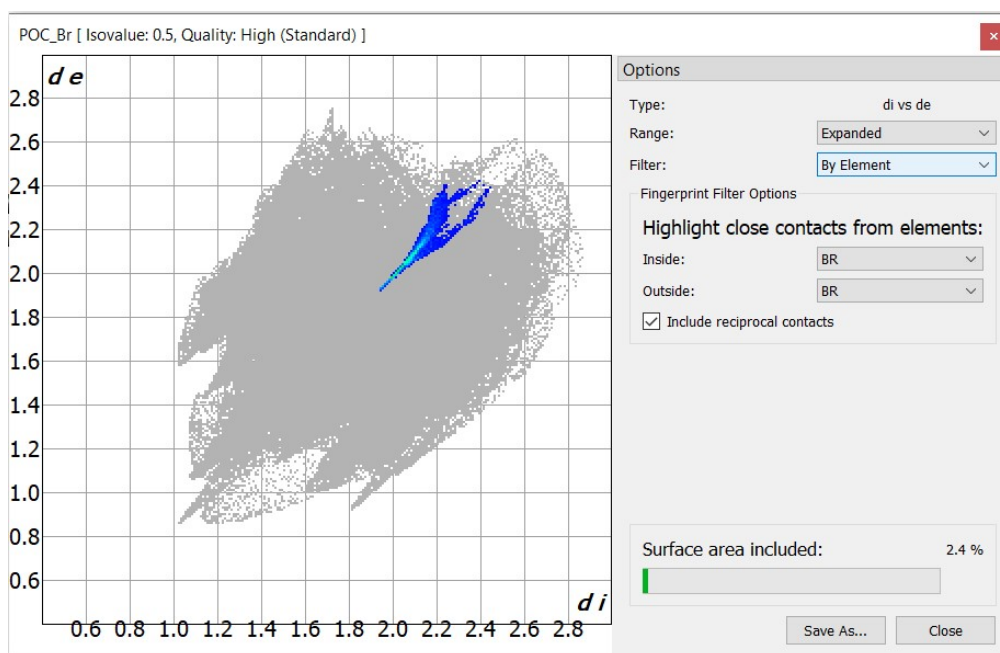

**Fig. S44.** Hirshfeld surface generated 2D fingerprint plot highlighting the relative contribution from Br...Br close contacts in the crystal structure of **[P3·(CH<sub>3</sub>)<sub>2</sub>CO]**.

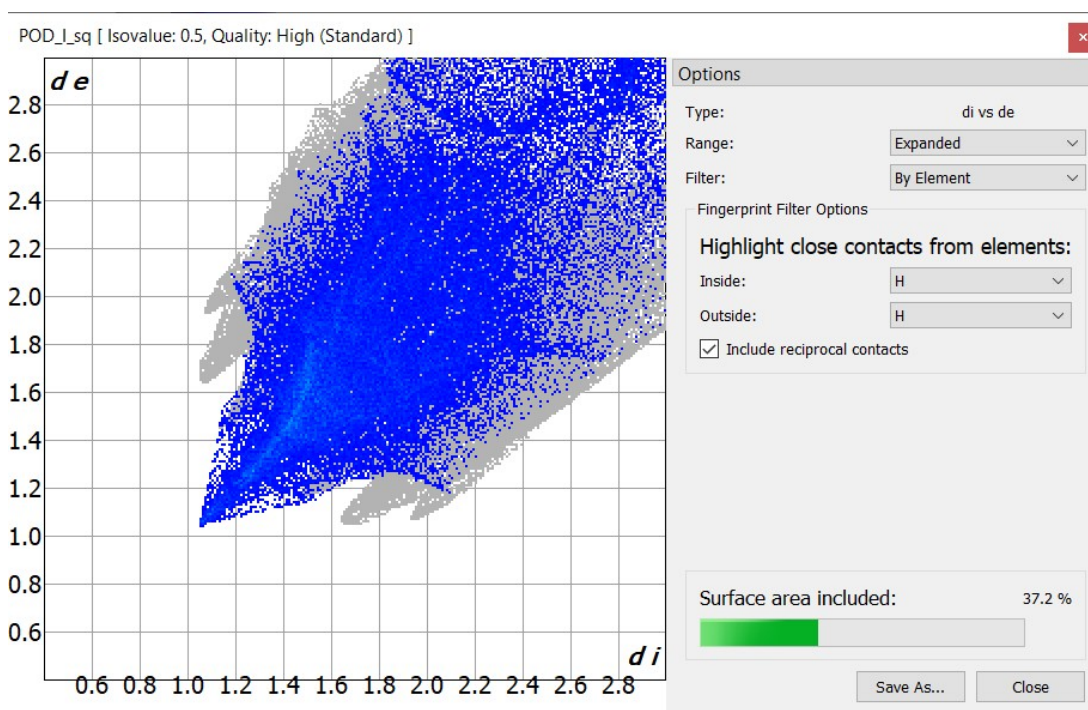

**Fig. S45.** Hirshfeld surface generated 2D fingerprint plot highlighting the relative contribution from H...H close contacts in the crystal structure of **P4**.

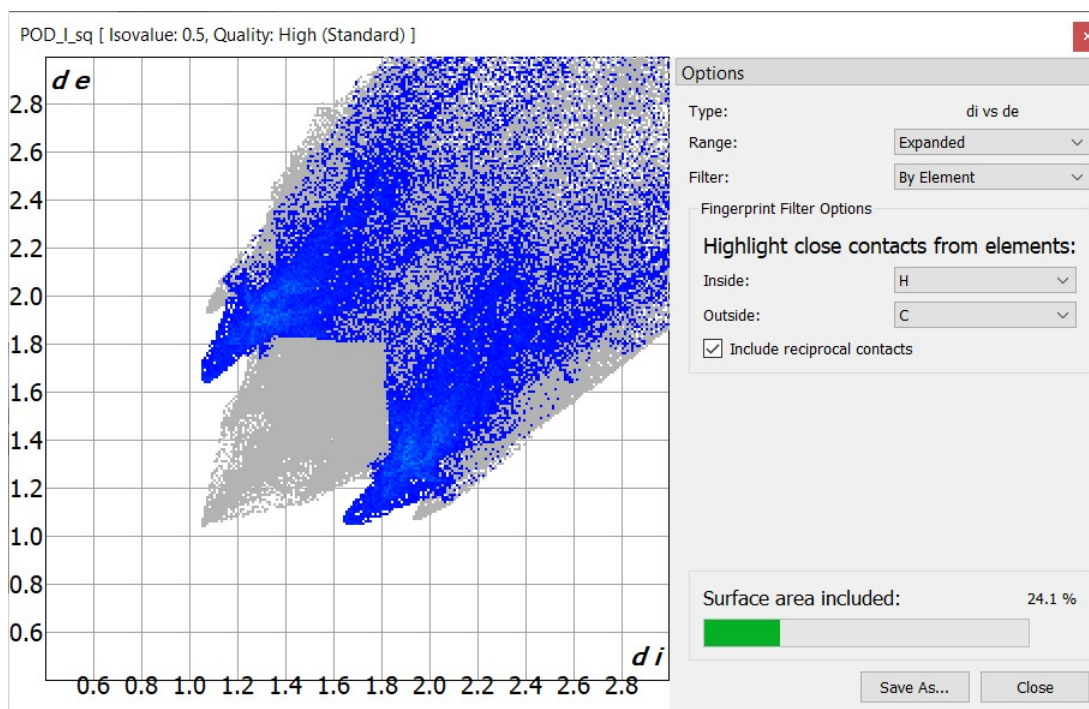

**Fig. S46.** Hirshfeld surface generated 2D fingerprint plot highlighting the relative contribution from H...C close contacts in the crystal structure of **P4**.

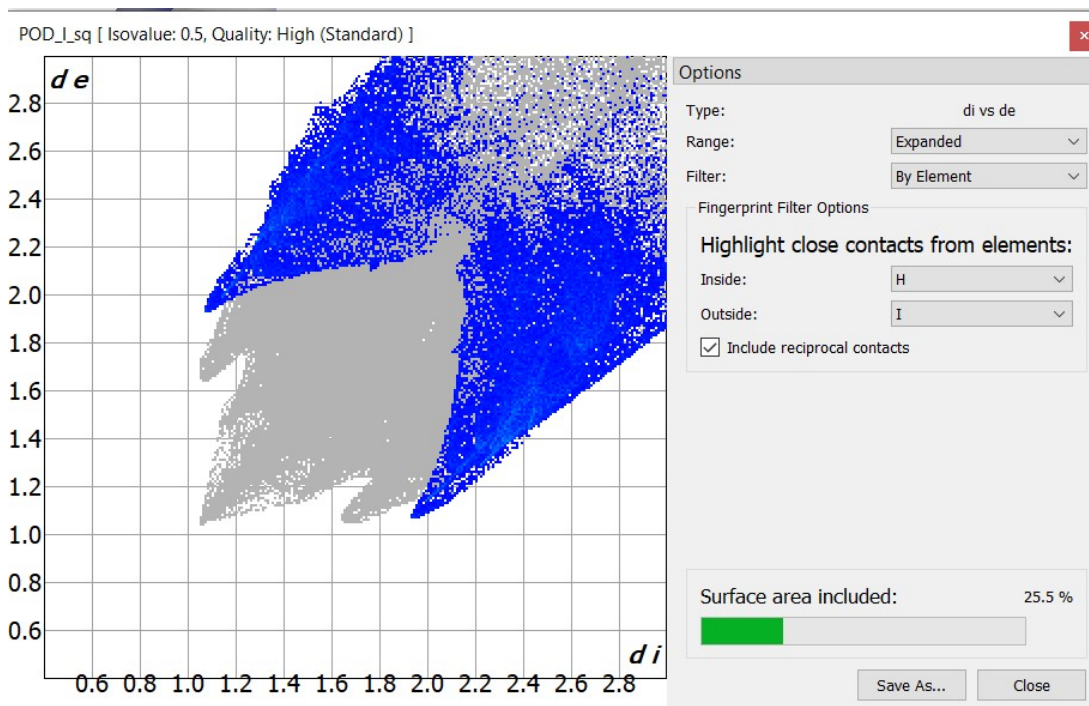

**Fig. S47.** Hirshfeld surface generated 2D fingerprint plot highlighting the relative contribution from H...I close contacts in the crystal structure of **P4**.

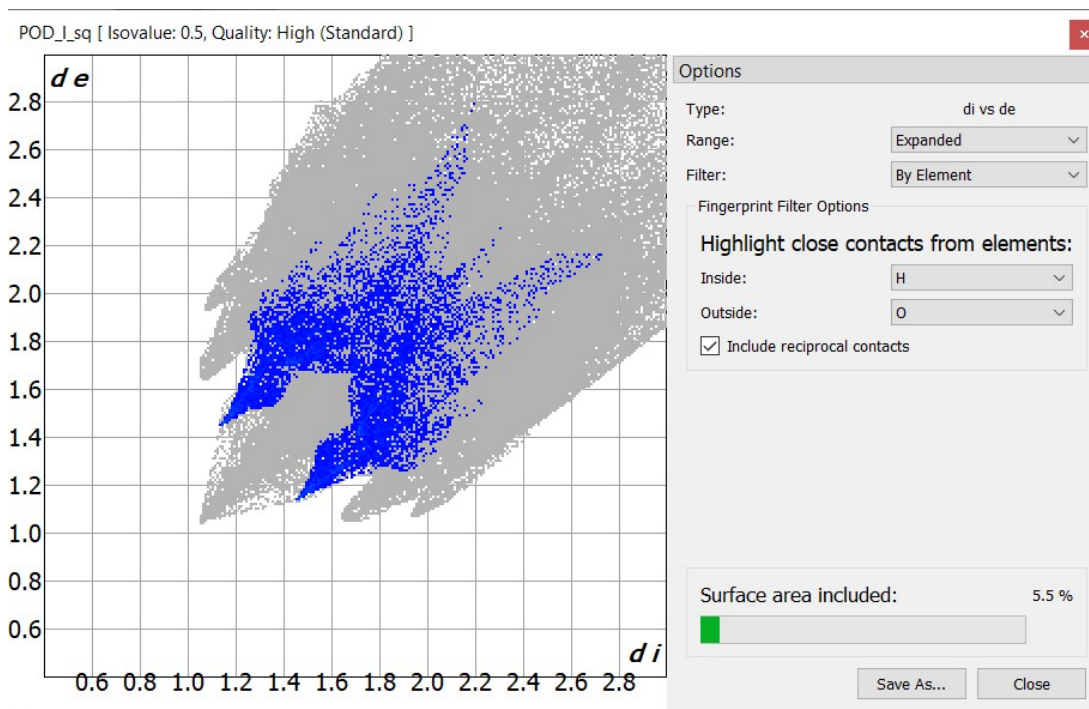

**Fig. S48.** Hirshfeld surface generated 2D fingerprint plot highlighting the relative contribution from H...O close contacts in the crystal structure of **P4**.

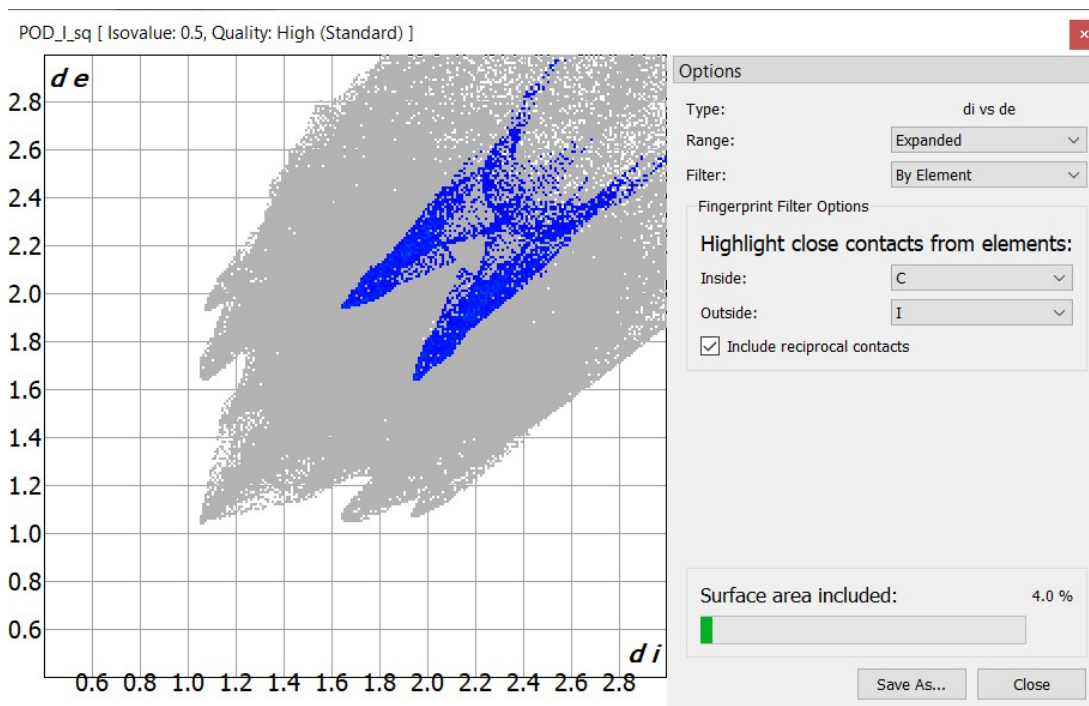

**Fig. S49.** Hirshfeld surface generated 2D fingerprint plot highlighting the relative contribution from C...I close contacts in the crystal structure of **P4**.



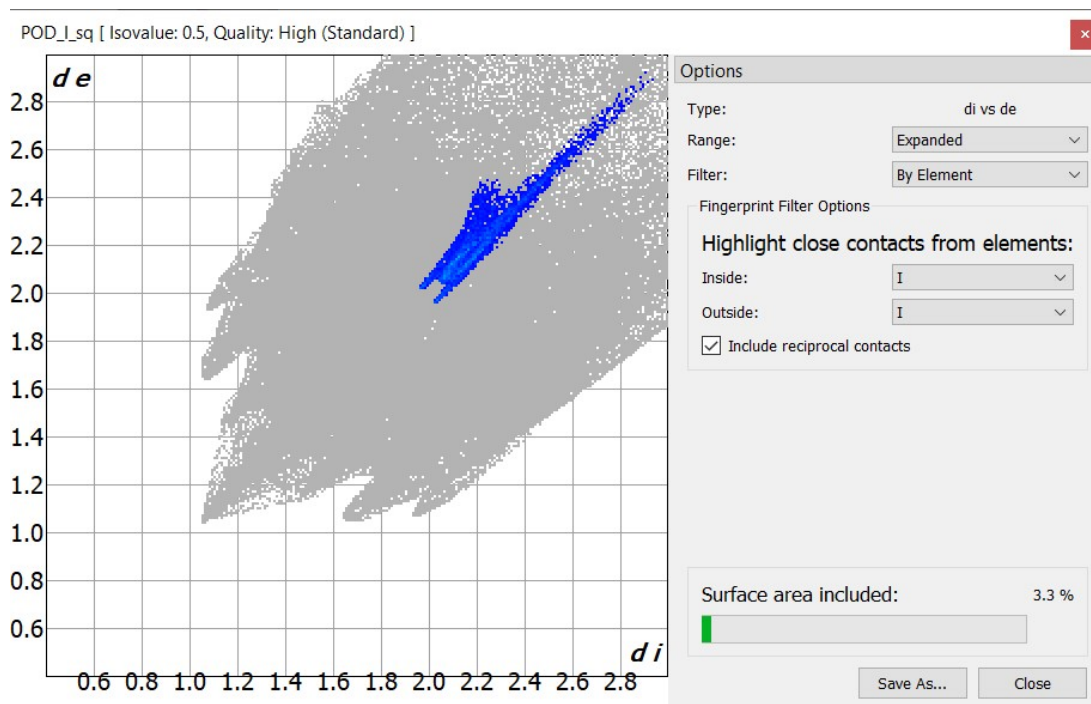

**Fig. S50.** Hirshfeld surface generated 2D fingerprint plot highlighting the relative contribution from I...I close contacts in the crystal structure of **P4**.

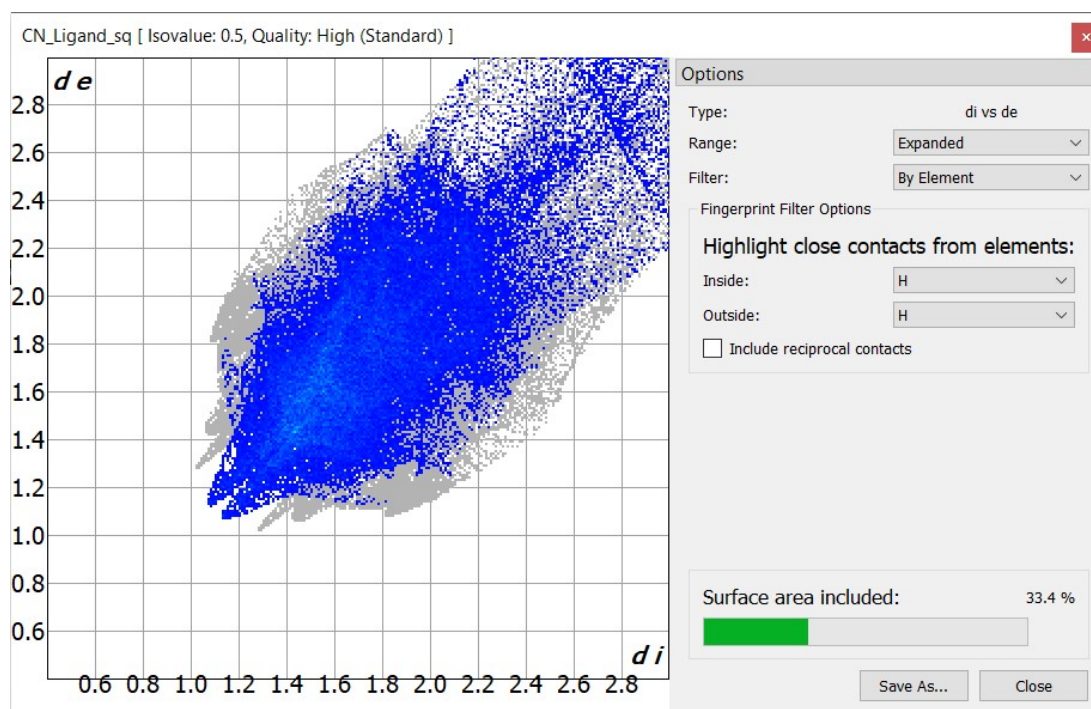

**Fig. S51.** Hirshfeld surface generated 2D fingerprint plot highlighting the relative contribution from H...H close contacts in the crystal structure of **P9**.

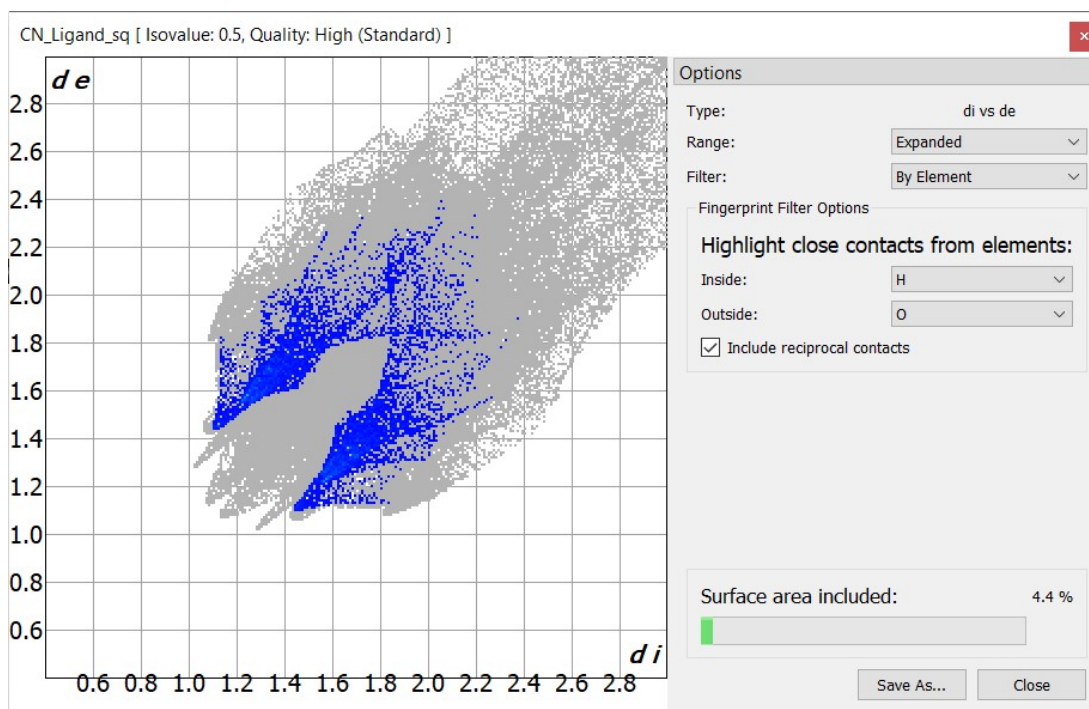

**Fig. S52.** Hirshfeld surface generated 2D fingerprint plot highlighting the relative contribution from H...O close contacts in the crystal structure of **P9**.

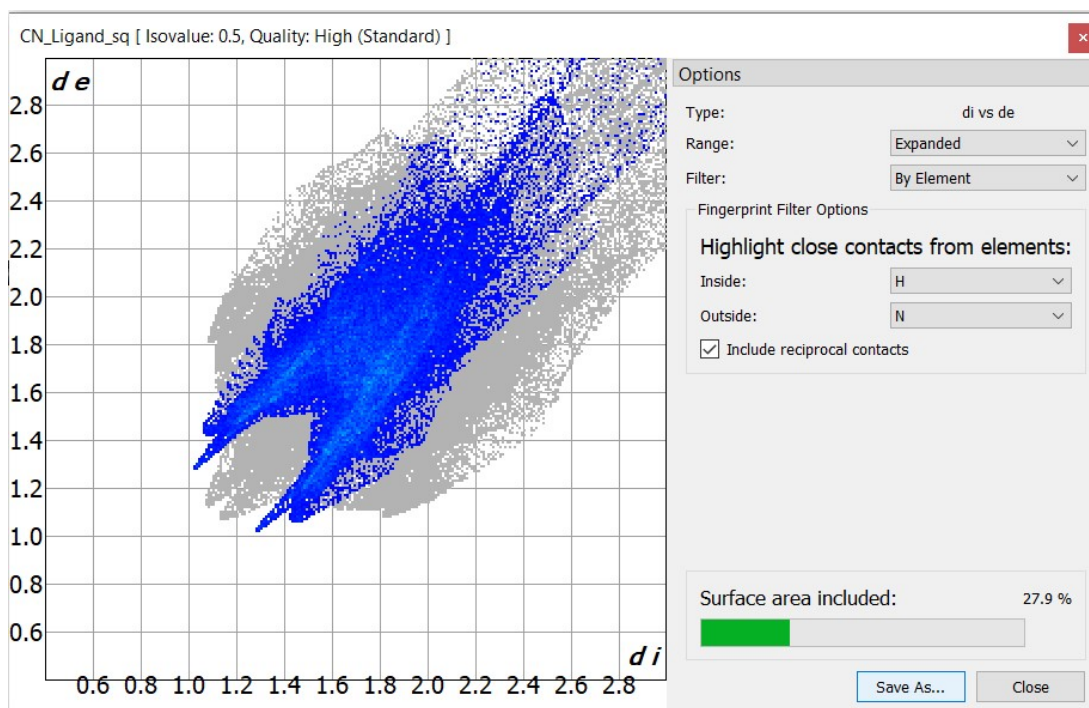

**Fig. S53.** Hirshfeld surface generated 2D fingerprint plot highlighting the relative contribution from H...N close contacts in the crystal structure of **P9**.

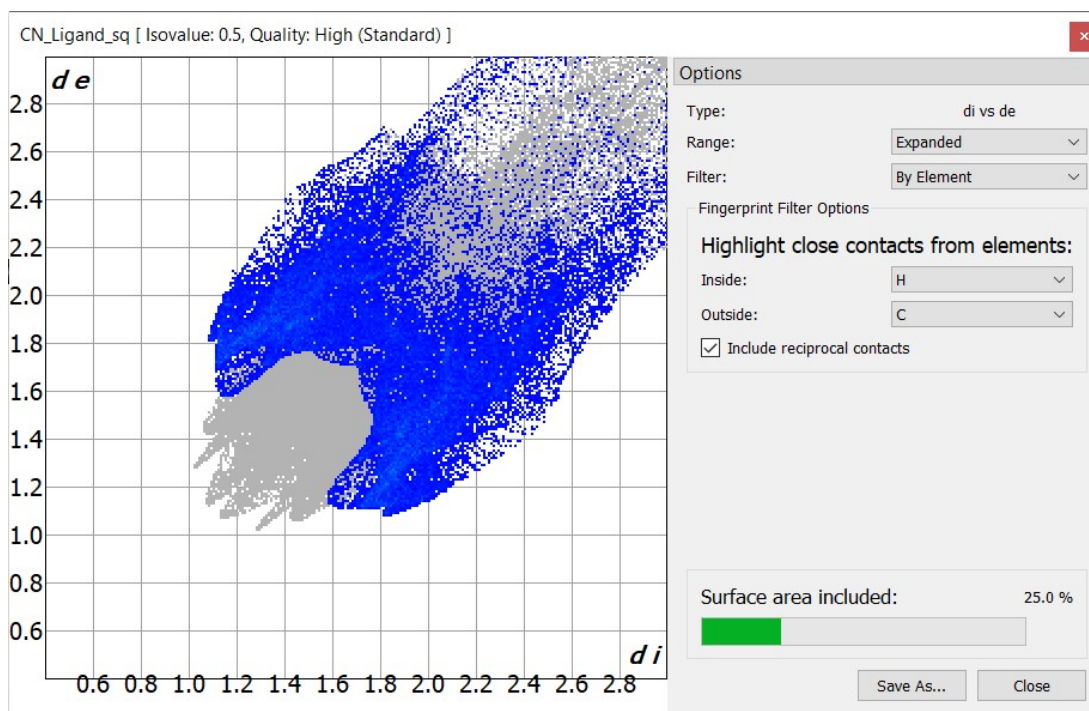

**Fig. S54.** Hirshfeld surface generated 2D fingerprint plot highlighting the relative contribution from H...C close contacts in the crystal structure of **P9**.

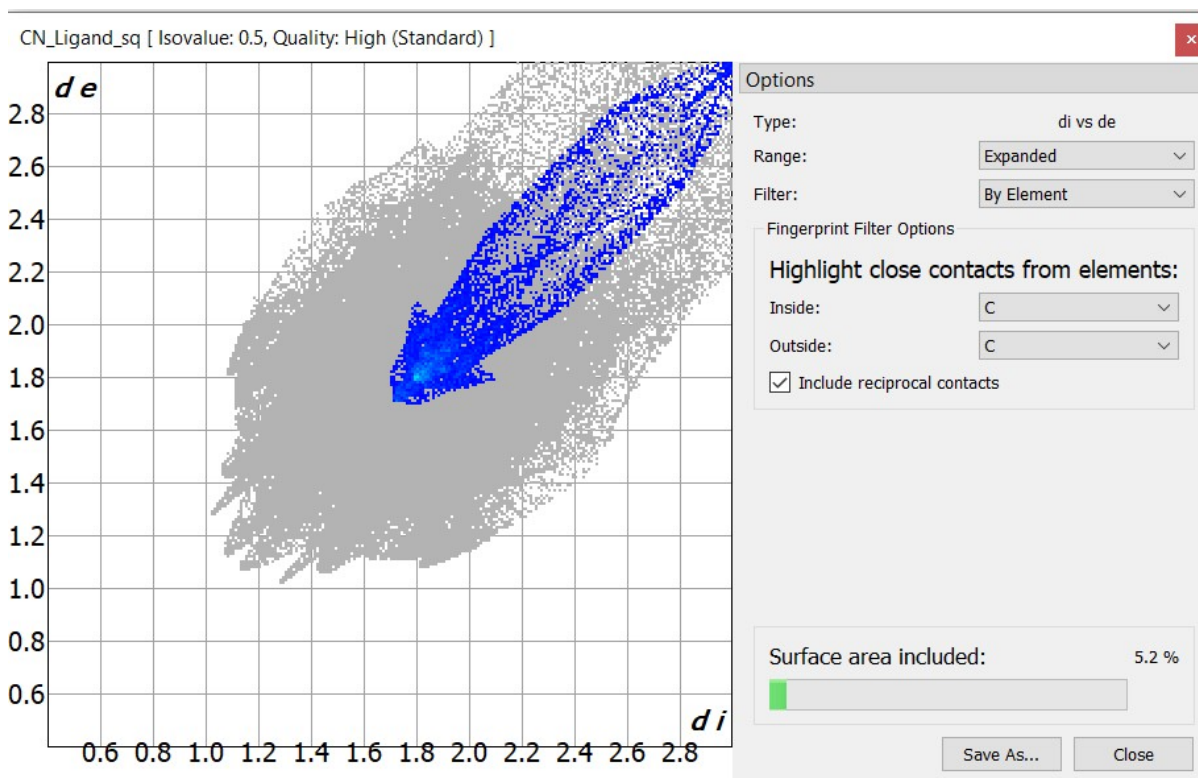

**Fig. S55.** Hirshfeld surface generated 2D fingerprint plot highlighting the relative contribution from C...C close contacts in the crystal structure of **P9**.

## 6. C-X...F<sup>-</sup> and C-X...F<sup>-</sup>...H-F halogen bonding in solution (X = I/Br)

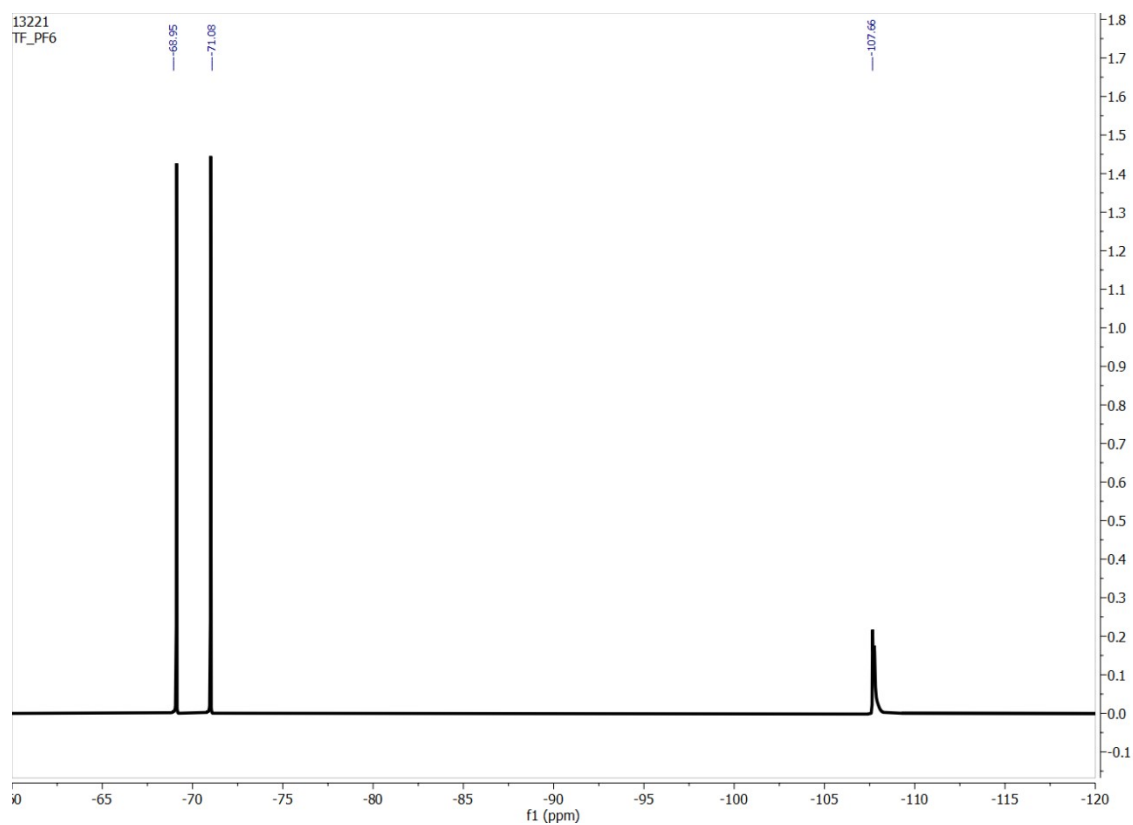

**Fig. S56.** <sup>19</sup>F NMR spectrum of (Et)<sub>4</sub>N<sup>+</sup>F<sup>-</sup> using (n-Bu)<sub>4</sub>N<sup>+</sup>PF<sub>6</sub><sup>-</sup> as a reference in DMSO-D<sub>6</sub>.

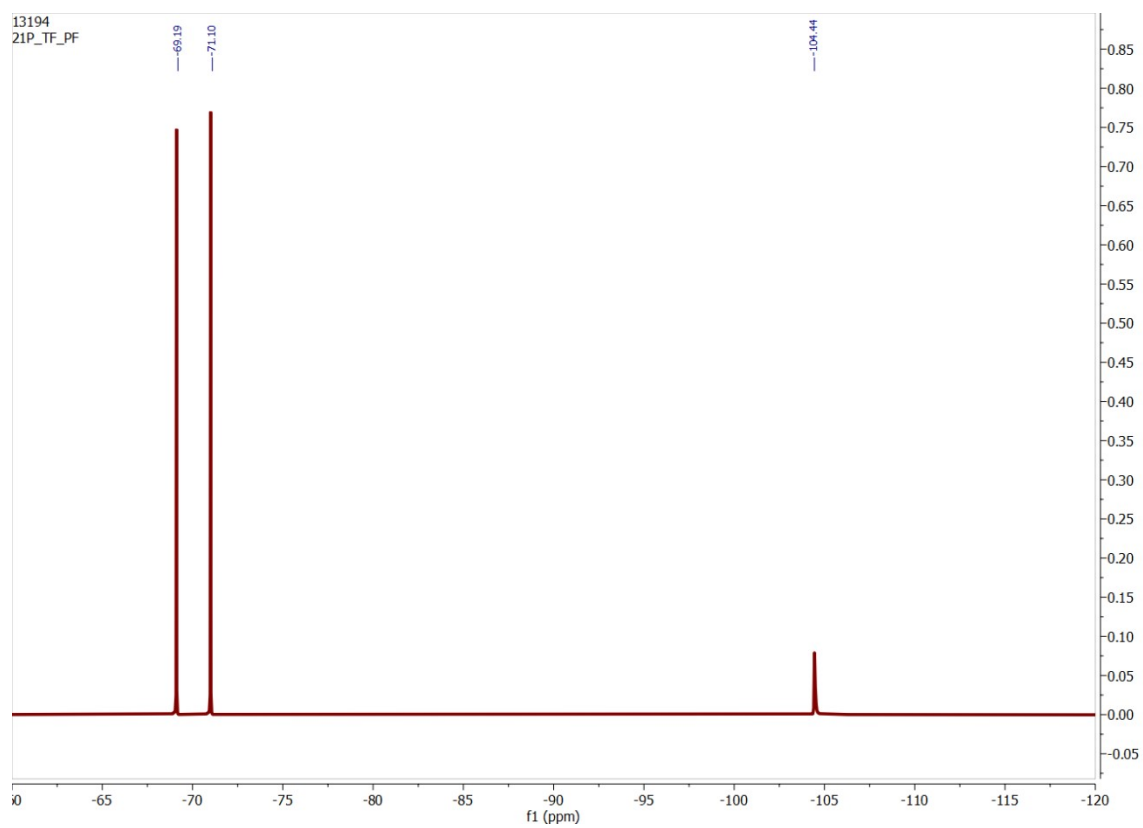

**Fig. S57.** <sup>19</sup>F NMR spectrum of (Et)<sub>4</sub>N<sup>+</sup>F<sup>-</sup> in the presence of equivalent amount of **P5** using (n-Bu)<sub>4</sub>N<sup>+</sup>PF<sub>6</sub><sup>-</sup> as a reference in DMSO-D<sub>6</sub>. Fluoride signal appeared at -104.4 ppm.



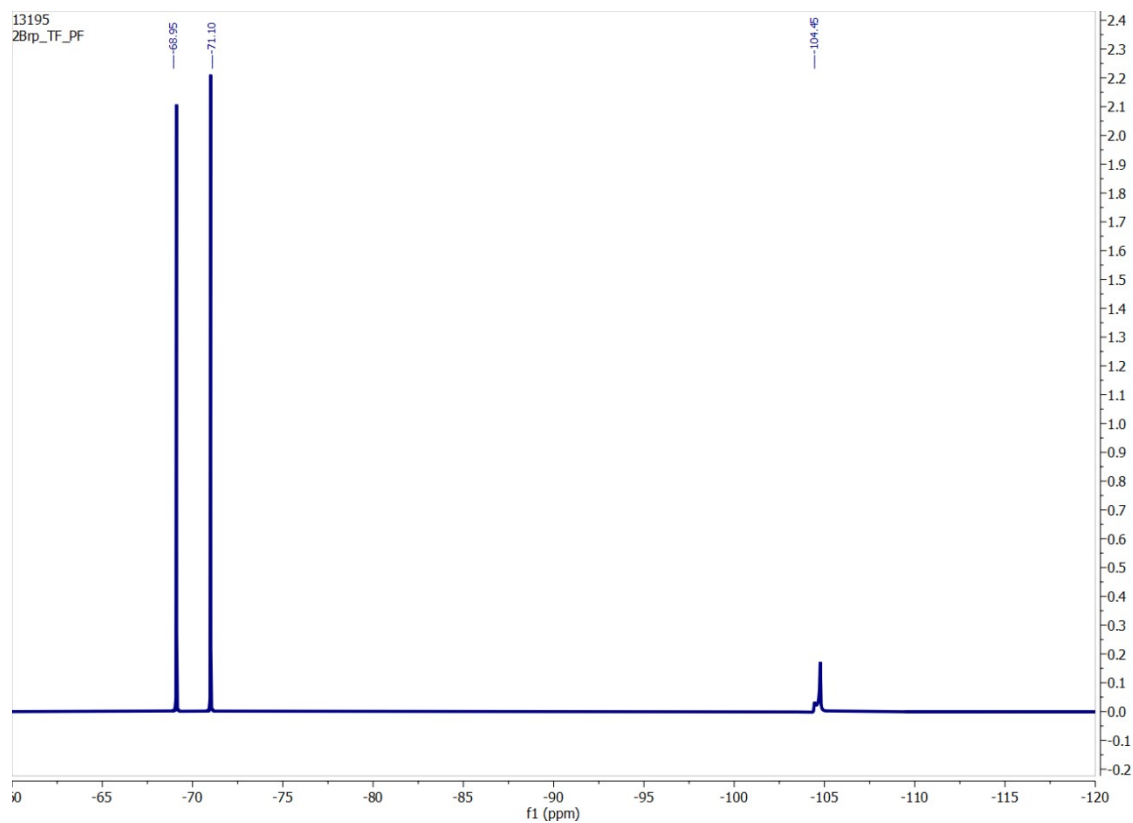

**Fig. S58.**  $^{19}\text{F}$  NMR spectrum of  $(\text{Et})_4\text{N}^+\text{F}^-$  in the presence of equivalent amount of **P6** using  $(n\text{-Bu})_4\text{N}^+\text{PF}_6^-$  as a reference in  $\text{DMSO-D}_6$ . Fluoride signal appeared at  $-104.4$  ppm.

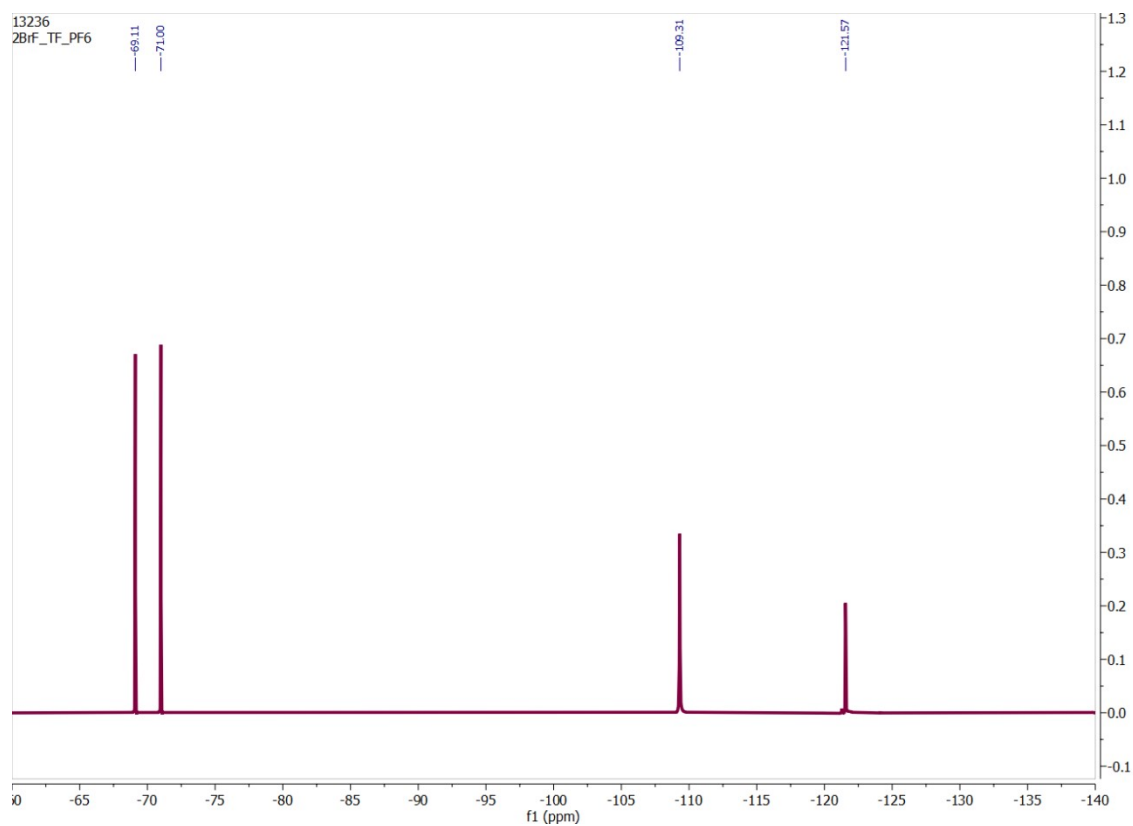

**Fig. S59.**  $^{19}\text{F}$  NMR spectrum of  $(\text{Et})_4\text{N}^+\text{F}^-$  in the presence of equivalent amount of **P7** using  $(n\text{-Bu})_4\text{N}^+\text{PF}_6^-$  as a reference in  $\text{DMSO-D}_6$ . Fluoride signal appeared at  $-109.3$  ppm and podand signal at  $-121.5$  ppm.

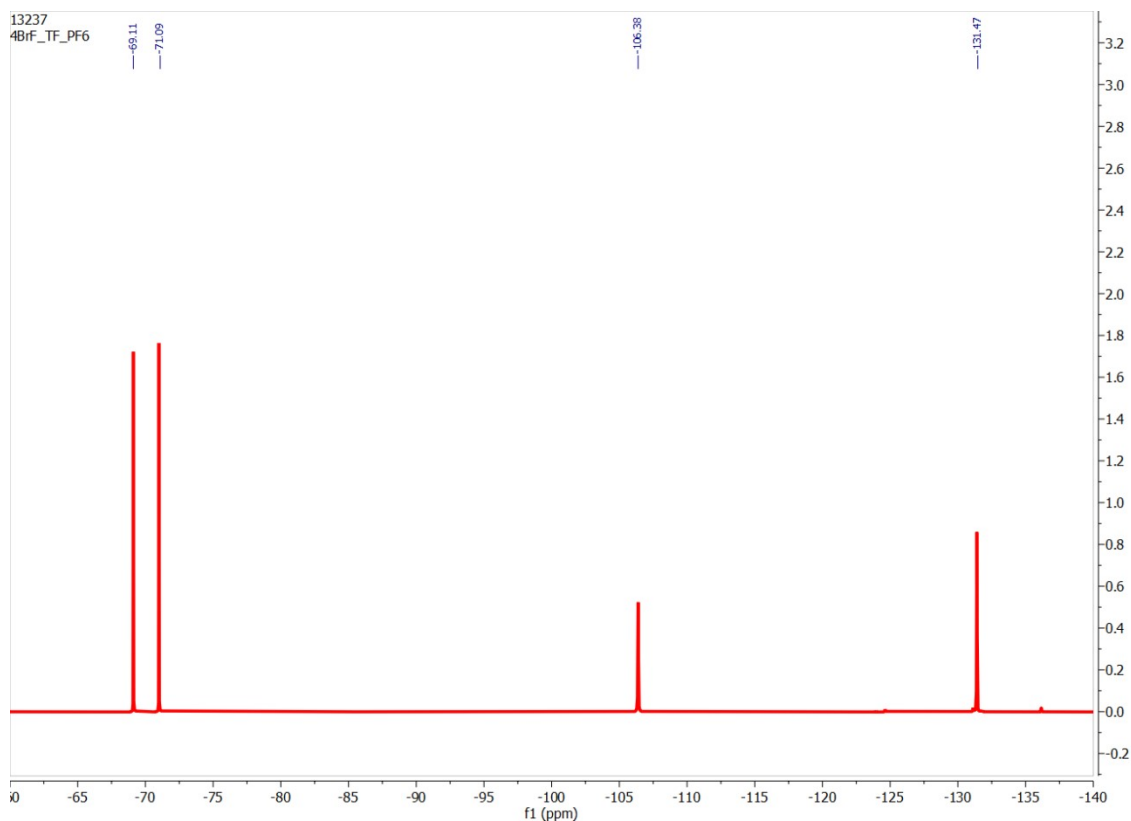

**Fig. S60.**  $^{19}\text{F}$  NMR spectrum of  $(\text{Et})_4\text{N}^+\text{F}^-$  in the presence of equivalent amount of **P8** using  $(n\text{-Bu})_4\text{N}^+\text{PF}_6^-$  as a reference in  $\text{DMSO-D}_6$ . Fluoride signal appeared at  $-106.3$  ppm and podand signal at  $-131.4$  ppm.

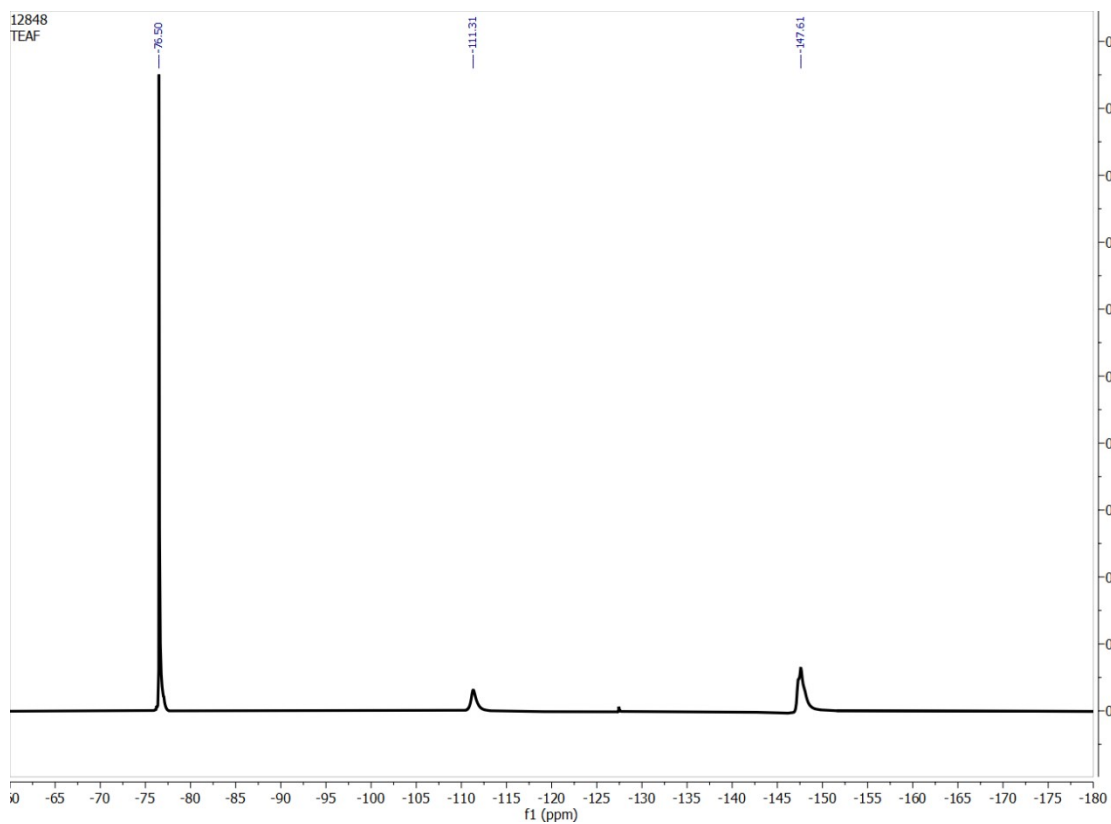

**Fig. S61.**  $^{19}\text{F}$  NMR spectrum of  $(\text{Et})_4\text{N}^+\text{F}^-$  in the presence of trifluoroacetic acid (10 equiv.) showing the in-situ formation of hydrogen bifluoride,  $\text{HF}_2^-$  signal at  $-147.6$  ppm in  $\text{DMSO-D}_6$ .

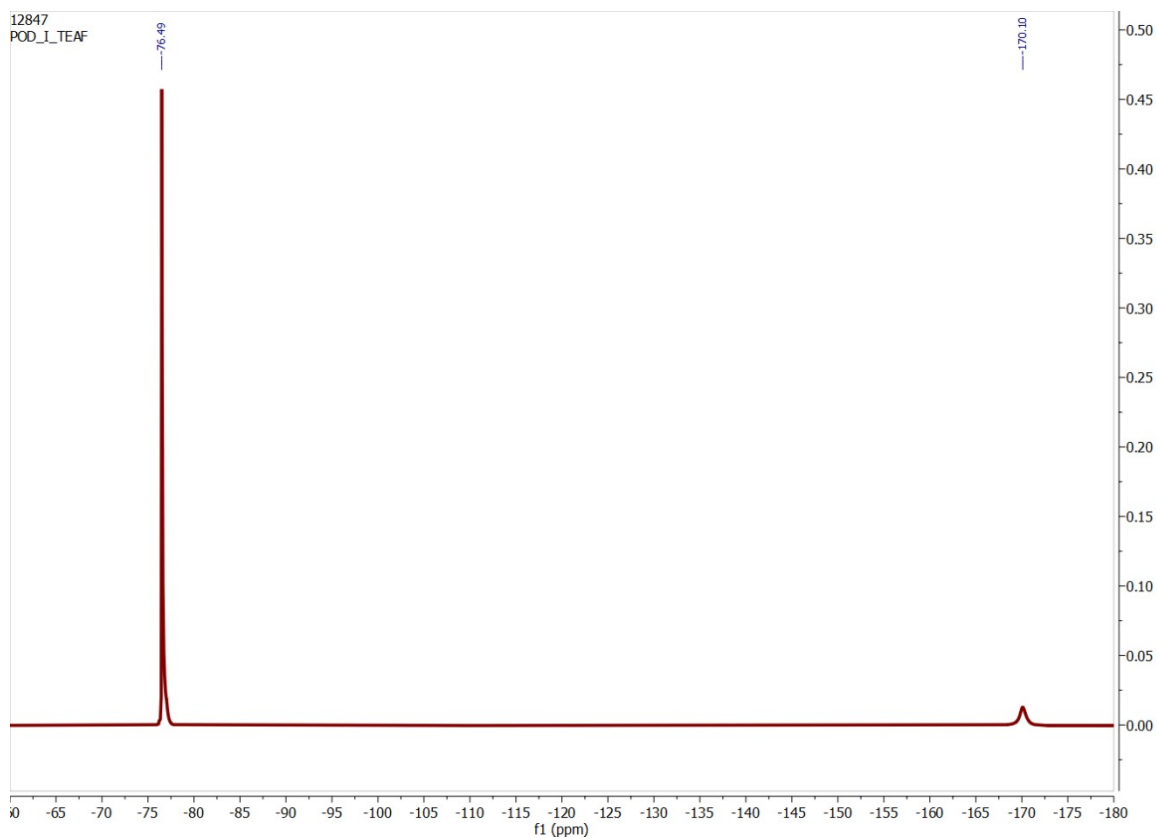

**Fig. S62.**  $^{19}\text{F}$  NMR spectrum of  $(\text{Et})_4\text{N}^+\text{F}^-$  in the presence of equivalent amount of **P6** and 10 equiv. trifluoroacetic acid (reference) in  $\text{DMSO-D}_6$ . Hydrogen bifluoride signal appeared at  $-170.1$  ppm.

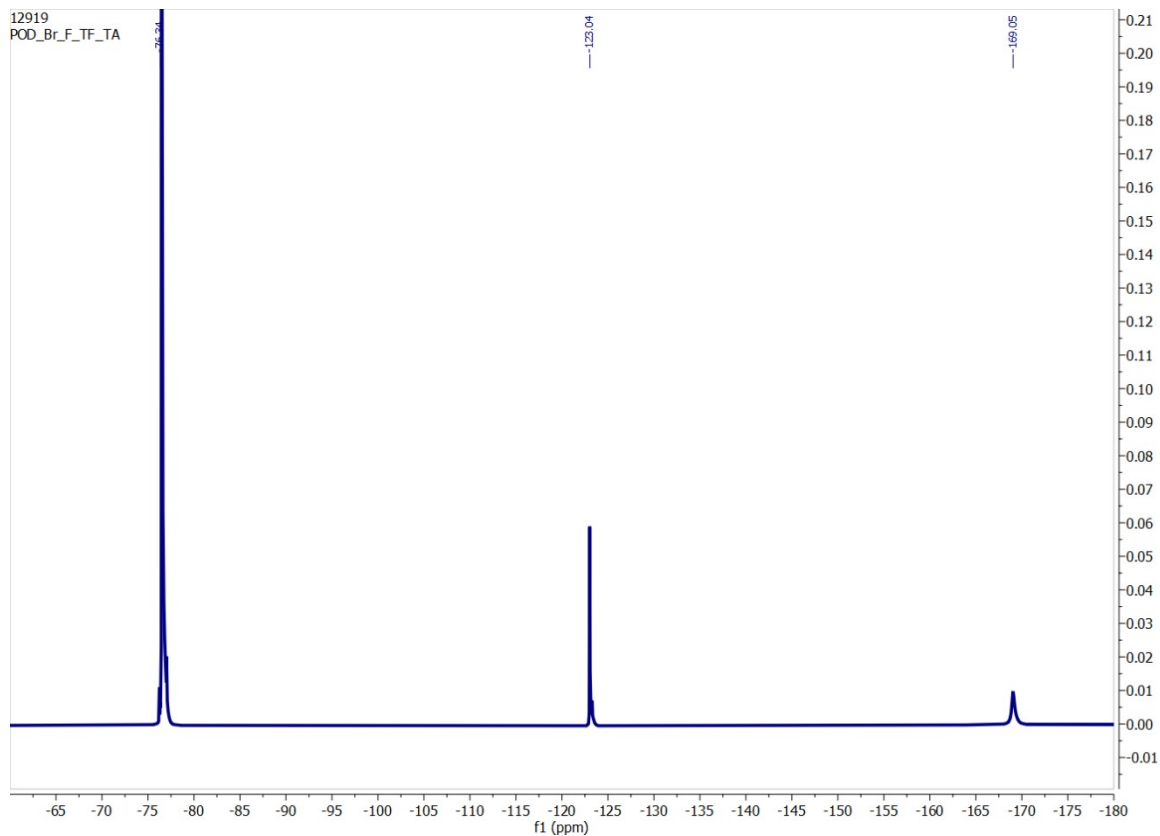

**Fig. S63.**  $^{19}\text{F}$  NMR spectrum of  $(\text{Et})_4\text{N}^+\text{F}^-$  in the presence of equivalent amount of **P7** and 10 equiv. trifluoroacetic acid (reference) in  $\text{DMSO-D}_6$ . Hydrogen bifluoride signal appeared at  $-169.0$  ppm.

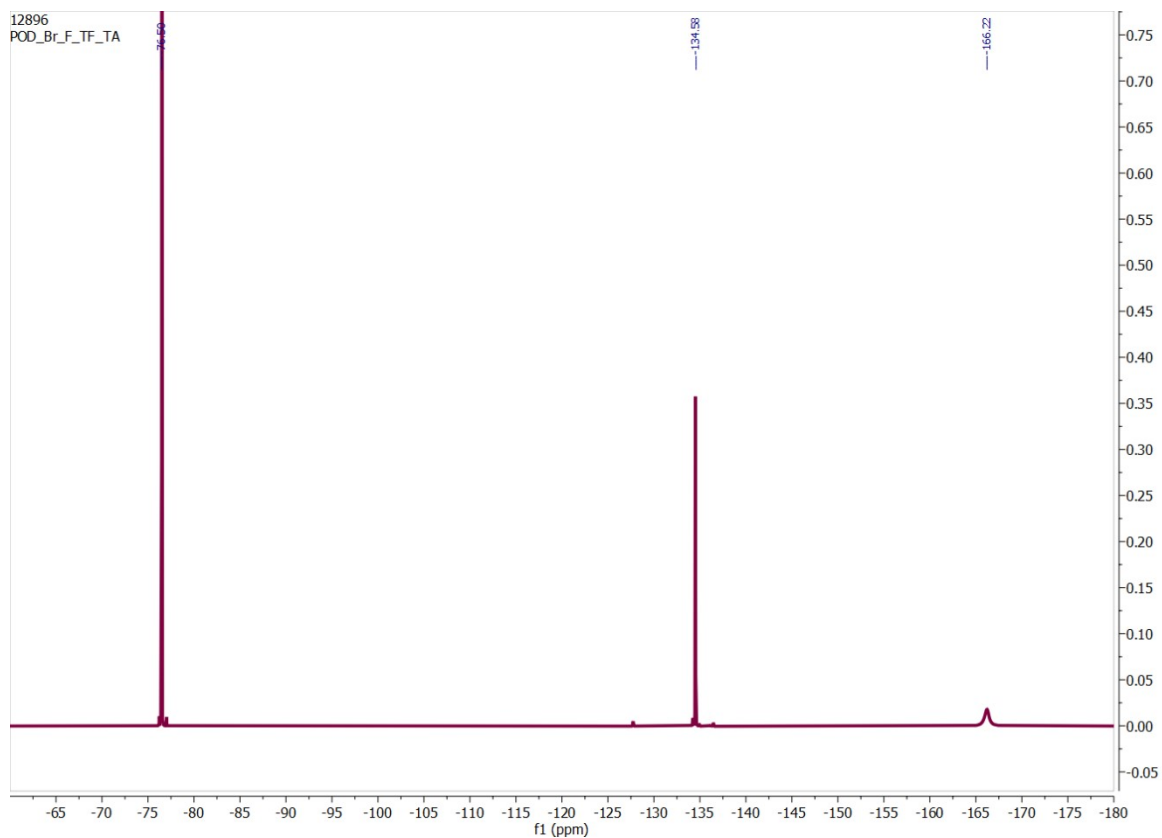

**Fig. S64.**  $^{19}\text{F}$  NMR spectrum of  $(\text{Et})_4\text{N}^+\text{F}^-$  in the presence of equivalent amount of **P8** and 10 equiv. trifluoroacetic acid (reference) in  $\text{DMSO-D}_6$ . Hydrogen bifluoride signal appeared at  $-166.2$  ppm.

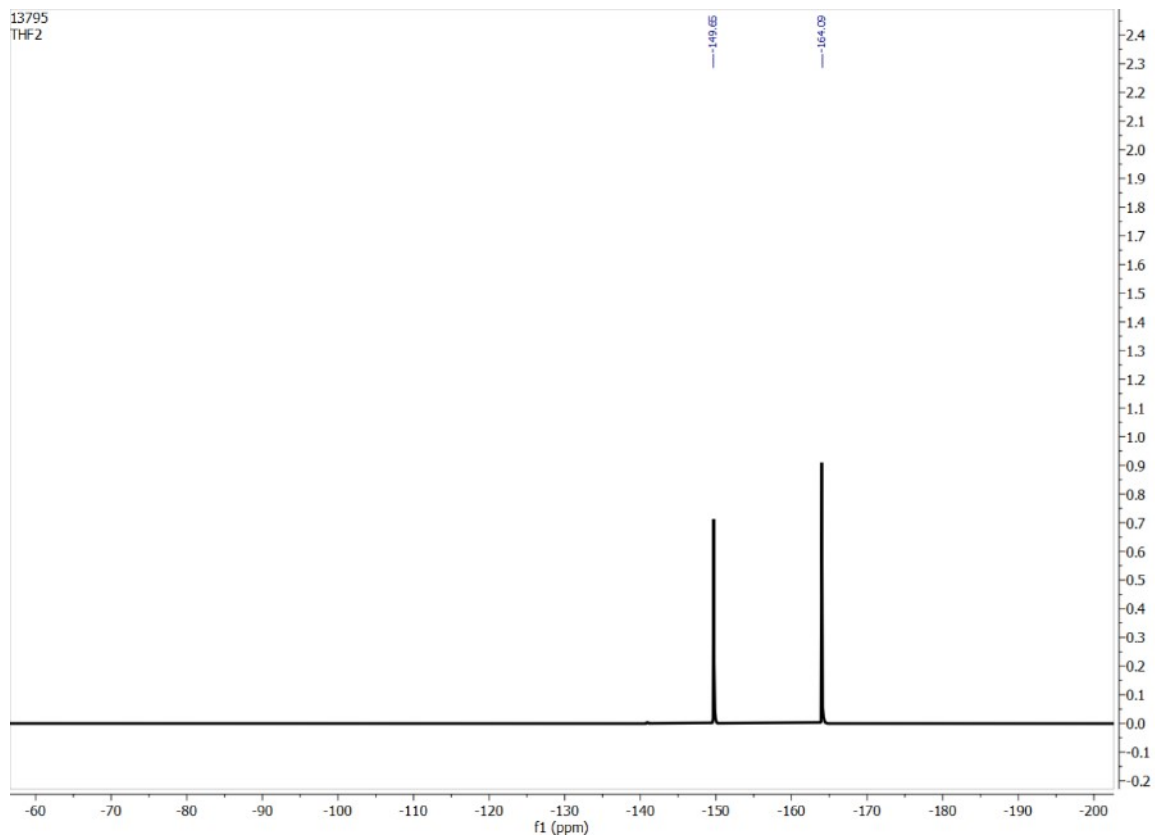

**Fig. S65.**  $^{19}\text{F}$  NMR spectrum of  $(n\text{-Bu})_4\text{N}^+\text{HF}_2^-$  ( $\text{HF}_2^-$  signal  $-149.6$ ) using hexafluoro-benzene a reference ( $\text{C}_6\text{F}_6$  signal  $-164.0$ ).

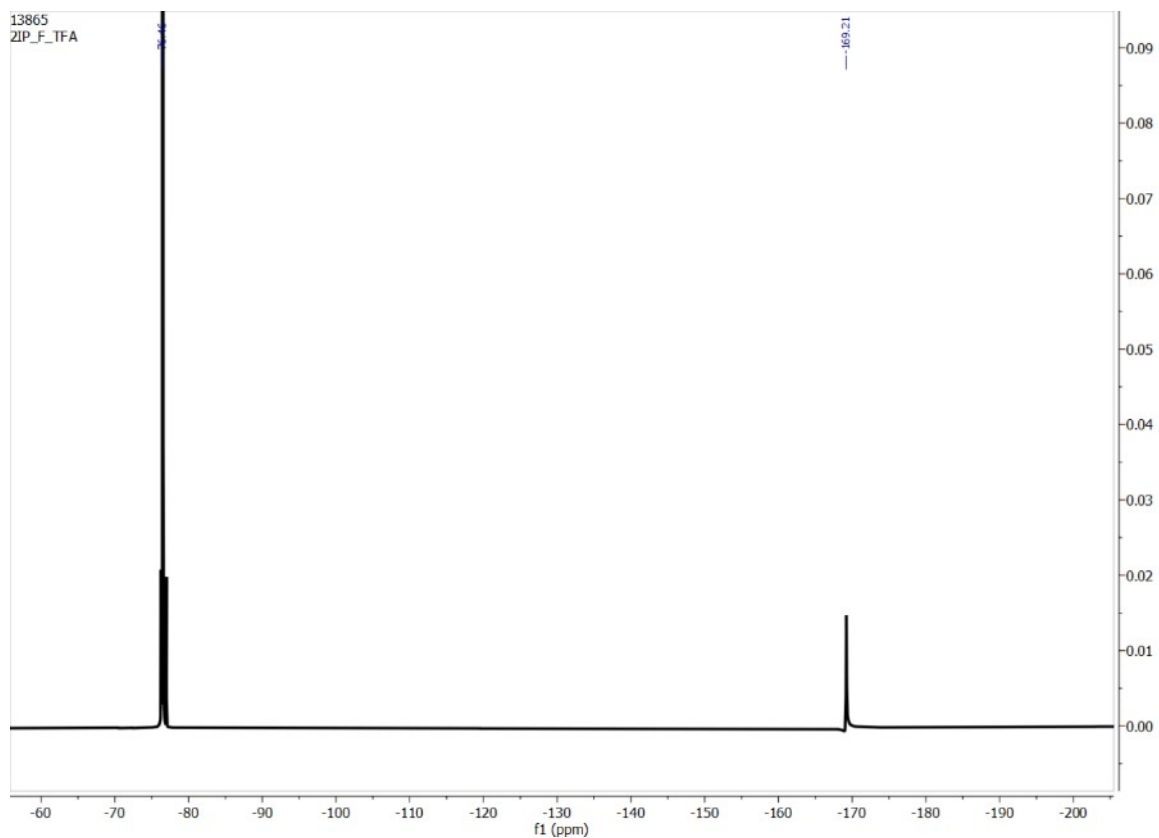

**Fig. S66.**  $^{19}\text{F}$  NMR spectrum of  $(n\text{-Bu})_4\text{N}^+\text{F}^-$  in the presence of equivalent amount of **P5** and 10 equiv. trifluoroacetic acid (reference) in  $\text{DMSO-D}_6$ . Hydrogen bifluoride signal appeared at  $-169.2$  ppm.

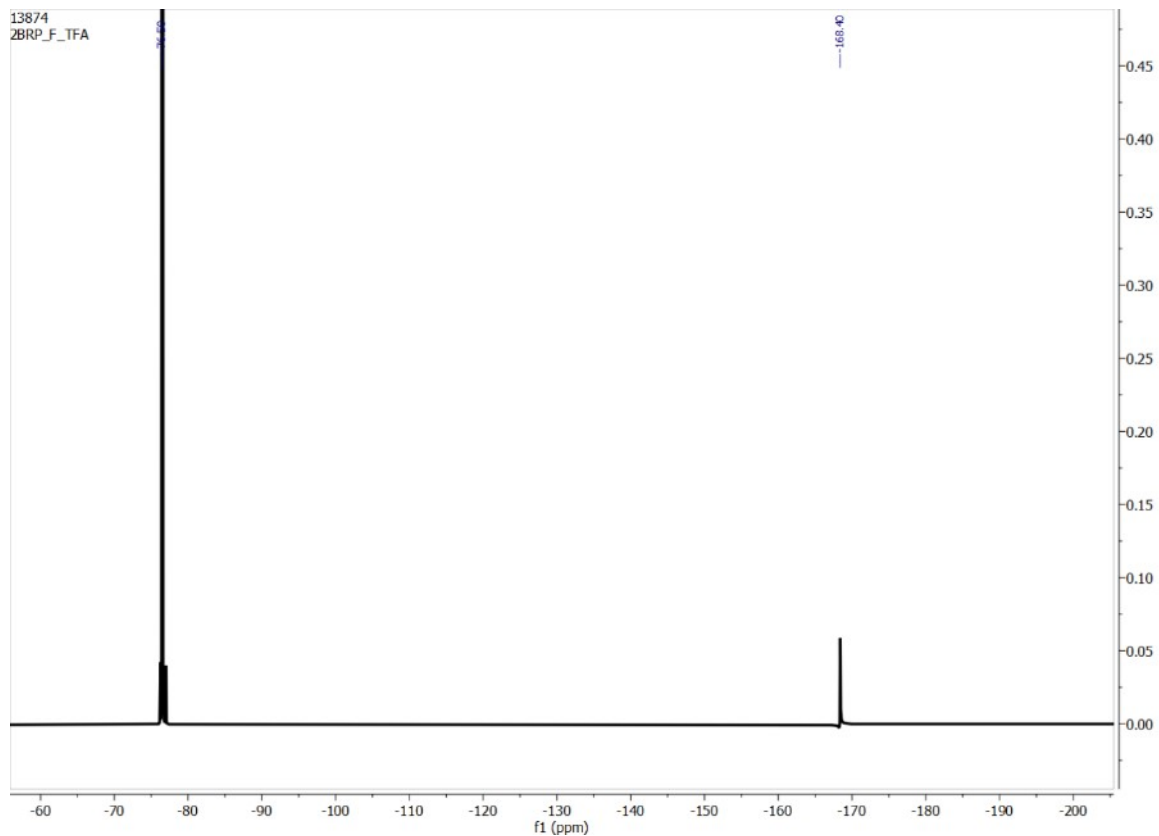

**Fig. S67.**  $^{19}\text{F}$  NMR spectrum of  $(n\text{-Bu})_4\text{N}^+\text{F}^-$  in the presence of equivalent amount of **P5** and 10 equiv. trifluoroacetic acid (reference) in  $\text{DMSO-D}_6$ . Hydrogen bifluoride signal appeared at  $-169.2$  ppm.
